# Supplementary material for: Genome-wide association analysis of plasma lipidome identifies 495 genetic associations
Source: PubMed Central journal article supplement (PMC10618167; doi:10.1038/s41467-023-42532-8), 2023-10-31
Supplement: 41467_2023_42532_MOESM1_ESM.pdf [file 41467_2023_42532_MOESM1_ESM.pdf]

## Supplementary Information

### Supplementary Notes

#### Supplementary Note 1: Rare variants reaching high PIP only in multivariate fine-mapping and low PIP in standard lipids fine-mapping in UKB

Three rare variants with CADD score  $> 10$ , rs201563586 (MAF=0.002), rs186249276 (MAF=0.004) and rs1292311927 (MAF=0.004), reached a PIP  $> 0.9$  in multivariate analysis but not in any univariate analysis and had PIP  $< 0.001$  in standard lipids fine-mapping in UKBB.

The *LIPC* missense variant rs201563586 reached a PIP of 0.999838 for cluster 2 and a  $P$ -value of  $8e-8$ . The lead SNP of the GWAS region, rs10468017, is not rare (MAF=0.338). In univariate fine-mapping the variant is the representative variant for uninformative credible sets of PE 16:0;0\_20:4;0 (PIP=0.9119,  $P=2e-8$ ) and PE 18:0;0\_20:4;0 (PIP=0.9217,  $P=3e-8$ ).

The *ABHD3* missense variant rs186249276 reached high PIPs of 0.9681 and 0.9333 for cluster 2 and cluster 3. The lead variant of the GWAS region, rs181026394, is also rare (MAF=0.007) but reached a low  $P$ -value in univariate GWAS of a trait included in cluster 2 ( $P=7e-20$  for PC 14:0;0\_18:2;0) and a trait included in cluster 3 ( $P=6e-11$  for PC 16:1;0\_18:1;0) so no simulation was performed for this variant. The missense variant rs186249276 reaches  $P$ -values of  $4e-19$  and  $5e-12$  for cluster 2 and cluster 3, respectively. The variant is a representative variant for PC 14:0;0\_18:1;0 (PIP=0.3838,  $P=2e-10$ ) and for an uninformative credible set of PC 14:0;0\_18:2;0 (PIP=0.4485,  $P=6e-8$ ). These lipid species are included in cluster 2, however the variant was not among the representative variants of traits included in cluster 3. The region was only fine-mapped for one trait included in cluster 3, PC 16:1;0\_18:1;0 (PIP = 0.004,  $P=2e-2$ ).

The *ELOVL2* splice region variant rs1292311927 reached a PIP of 0.9898 and a  $P$ -value of  $2e-7$  for cluster 6. The lead variant of the GWAS, rs9468401, is not rare (MAF=0.153) and reached a  $P$ -value of  $6e-20$ . The lowest univariate  $P$ -value of the lead variant for a univariate trait of cluster 6 was  $1e-5$  for CE 22:6;0. The region was not fine-mapped for any univariate GWAS.

#### Supplementary Note 2: Correlation with standard lipids of traits for which high PIP variants were found by FINEMAP

We classified the variants for which high PIP variants were found by FINEMAP by their UKB fine-mapping results into 4 categories: (1) variants with CADD score  $> 10$  and PIP  $\leq 0.1$  in UKB, (2) variants with CADD score  $> 10$  and PIP  $> 0.1$  in UKB, (3) variants with CADD score  $\leq 10$  and PIP  $\leq 0.1$  in UKB, (4) variants with CADD score  $\leq 10$  and PIP  $> 0.1$  in UKB.

To compare the correlation between standard lipids and lipid species or LCP-phenotypes, we defined the maximum correlation  $mrt$  between trait  $t$  and standard lipids as:

$$(1) mrt = \max(|\text{corr}(t, \text{HDL})|, |\text{corr}(t, \text{LDL})|, |\text{corr}(t, \text{TG})|, |\text{corr}(t, \text{TC})|)$$

We calculated the maximum correlation  $mr_v$  for a variant  $v$  as:

$$(2) mr_v = \max(\text{MRT}),$$

with MRT being a list of all  $mrt$  values for traits  $t$  associated with  $v$ . We calculated the mean  $mr_v$  for variants included in each category. The mean  $mr_v$  was lower for variants reaching PIP  $\leq 0.1$  in UKB (category 1: 0.22, category 3: 0.19) compared to those reaching PIP  $> 0.1$  in UKB (category 2: 0.66, category 4: 0.30). Wilcoxon rank sum test of the two groups had a  $P$ -value of 0.01632.

### **Supplementary Note 3: FinnGen ethics statement**

Patients and control subjects in FinnGen provided informed consent for biobank research, based on the Finnish Biobank Act. Alternatively, separate research cohorts, collected prior the Finnish Biobank Act came into effect (in September 2013) and start of FinnGen (August 2017), were collected based on study-specific consents and later transferred to the Finnish biobanks after approval by Fimea (Finnish Medicines Agency), the National Supervisory Authority for Welfare and Health. Recruitment protocols followed the biobank protocols approved by Fimea. The Coordinating Ethics Committee of the Hospital District of Helsinki and Uusimaa (HUS) statement number for the FinnGen study is Nr HUS/990/2017.

The FinnGen study is approved by Finnish Institute for Health and Welfare (permit numbers: THL/2031/6.02.00/2017, THL/1101/5.05.00/2017, THL/341/6.02.00/2018, THL/2222/6.02.00/2018, THL/283/6.02.00/2019, THL/1721/5.05.00/2019 and THL/1524/5.05.00/2020), Digital and population data service agency (permit numbers: VRK43431/2017-3, VRK/6909/2018-3, VRK/4415/2019-3), the Social Insurance Institution (permit numbers: KELA 58/522/2017, KELA 131/522/2018, KELA 70/522/2019, KELA 98/522/2019, KELA 134/522/2019, KELA 138/522/2019, KELA 2/522/2020, KELA 16/522/2020), Findata permit numbers THL/2364/14.02/2020, THL/4055/14.06.00/2020, THL/3433/14.06.00/2020, THL/4432/14.06/2020, THL/5189/14.06/2020, THL/5894/14.06.00/2020, THL/6619/14.06.00/2020, THL/209/14.06.00/2021, THL/688/14.06.00/2021, THL/1284/14.06.00/2021, THL/1965/14.06.00/2021, THL/5546/14.02.00/2020, THL/2658/14.06.00/2021, THL/4235/14.06.00/202, Statistics Finland (permit numbers: TK-53-1041-17 and TK/143/07.03.00/2020 (earlier TK-53-90-20) TK/1735/07.03.00/2021, TK/3112/07.03.00/2021) and Finnish Registry for Kidney Diseases permission/extract from the meeting minutes on 4<sup>th</sup> July 2019.

The Biobank Access Decisions for FinnGen samples and data utilized in FinnGen Data Freeze 9 include: THL Biobank BB2017\_55, BB2017\_111, BB2018\_19, BB\_2018\_34, BB\_2018\_67, BB2018\_71, BB2019\_7, BB2019\_8, BB2019\_26, BB2020\_1, Finnish Red Cross Blood Service Biobank 7.12.2017, Helsinki Biobank HUS/359/2017, HUS/248/2020, Auria Biobank AB17-5154 and amendment #1 (August 17 2020), AB20-5926 and amendment #1 (April 23 2020) and it's modification (Sep 22 2021), Biobank Borealis of Northern Finland\_2017\_1013, Biobank of Eastern Finland 1186/2018 and amendment 22 § /2020, Finnish Clinical Biobank Tampere MH0004 and amendments (21.02.2020 & 06.10.2020), Central Finland Biobank 1-2017, and Terveystalo Biobank STB 2018001 and amendment 25<sup>th</sup> Aug 2020.

#### Supplementary Note 4: Simulation of multivariate $P$ -values under the null hypothesis

We simulated multivariate  $P$ -values for four SNPs with minor allele frequency (MAF) 0.002, 0.012, 0.052, and 0.084 using 100,000 permutations of the genotypes. The simulations were repeated with another set of 100,000 permutations. The QQ-plots showed inflated  $P$ -values, which are located outside the 95% confidence interval, for some of the clusters for the rare SNP (MAF < 0.01) and the low-frequency SNP ( $0.01 \leq \text{MAF} < 0.05$ ) and no inflation for the common SNPs (MAF > 0.05). From the simulations, we conclude that multivariate  $P$ -values of rare or low-frequency variants can be inflated and therefore we perform these simulations for all rare or low-frequency variants reaching genome-wide significance (GWS) in a multivariate analysis, which did not reach GWS in a univariate GWAS. This was the case for one rare variant and four low-frequency variants.

We then corrected the multivariate  $P$ -values by the mean of the genomic inflation factors ( $\lambda$ ), estimated from the simulations as the ratio of the median of the observed chi-square association statistics to its expectation under the null, if the simulations showed inflated  $P$ -values. More specifically, we divided the  $X^2$ -values by the mean  $\lambda$  over the two simulations and recalculated the  $P$ -values from the corrected  $X^2$ -values. We considered the simulated  $P$ -values to be inflated if the proportion of  $P$ -values < 0.01 was greater than 1.2%.

Empirical cumulative distribution function (ECDF)-plots for the five variants are shown in Supplementary Figure 17. We summarized the genomic inflation factors, the minimum  $P$ -value reached in the simulations and the proportion of  $P$ -values < 0.01 before and after correcting the  $P$ -values in Supplementary Table 4. For the first three variants rs77024033, rs4986970 and rs61751862, the proportion of  $P$ -values < 0.01 was greater than 1.2% and the  $P$ -values were therefore corrected. The rare variant rs77024033 is not GWS after the correction and is not reported as a GWS variant.

#### Supplementary Note 5: Supplemental acknowledgments

We want to acknowledge the participants and investigators of the FinnGen study. The FinnGen project is funded by two grants from Business Finland (HUS 4685/31/2016 and UH 4386/31/2016) and the following industry partners: AbbVie Inc., AstraZeneca UK Ltd, Biogen MA Inc., Bristol Myers Squibb (and Celgene Corporation & Celgene International II Sàrl), Genentech Inc., Merck Sharp & Dohme LCC, Pfizer Inc., GlaxoSmithKline Intellectual Property Development Ltd., Sanofi US Services Inc., Maze Therapeutics Inc., Janssen Biotech Inc, Novartis AG, and Boehringer Ingelheim International GmbH. Following biobanks are acknowledged for delivering biobank samples to FinnGen: Auria Biobank [[www.auria.fi/biopankki](http://www.auria.fi/biopankki)], THL Biobank [[www.thl.fi/biobank](http://www.thl.fi/biobank)], Helsinki Biobank [[www.helsinginbiopankki.fi](http://www.helsinginbiopankki.fi)], Biobank Borealis of Northern Finland [<https://www.ppsbp.fi/Tutkimus-ja-opetus/Biopankki/Pages/Biobank-Borealis-briefly-in-English.aspx>], Finnish Clinical Biobank Tampere [[www.tays.fi/en-US/Research\\_and\\_development/Finnish\\_Clinical\\_Biobank\\_Tampere](http://www.tays.fi/en-US/Research_and_development/Finnish_Clinical_Biobank_Tampere)], Biobank of Eastern Finland [[www.ita-suomenbiopankki.fi/en](http://www.ita-suomenbiopankki.fi/en)], Central Finland Biobank [[www.ksshp.fi/fi-FI/Potilaalle/Biopankki](http://www.ksshp.fi/fi-FI/Potilaalle/Biopankki)], Finnish Red Cross Blood Service Biobank [<http://www.veripalvelu.fi/verenluovutus/biopankkitoiminta>], Terveystalo Biobank [[www.terveystalo.com/fi/Yritystietoa/Terveystalo-Biopankki/Biopankki/](http://www.terveystalo.com/fi/Yritystietoa/Terveystalo-Biopankki/Biopankki/)] and Arctic Biobank [<https://www.oulu.fi/en/university/faculties-and-units/faculty-medicine/northern-finland-birth-cohorts-and-arctic-biobank>]. All Finnish Biobanks are members of BBMRI.fi infrastructure [[www.bbMRI.fi](http://www.bbMRI.fi)]. Finnish Biobank Cooperative -FINBB [<https://finbb.fi/>] is the coordinator of BBMRI-ERIC operations in Finland. The Finnish biobank data can be accessed through the FinnGen<sup>®</sup> services [<https://site.finnGenious.fi/en/>] managed by FINBB.

## Supplementary Tables

**Supplementary Table 1. Loci reaching genome-wide significance.**

| Locus             | Chr | Mv trait | Mv lead variant | Mv minP | Uv trait           | Uv lead variant | Uv minP | HDL | LDL | TC | TG | LS |
|-------------------|-----|----------|-----------------|---------|--------------------|-----------------|---------|-----|-----|----|----|----|
| <i>PBX1</i>       | 1   | 8        | rs144944992     | 3e-4    | CE 18:0;0          | rs144944992     | 4e-8    |     |     |    |    |    |
| <i>LINC01320</i>  | 2   | 6        | rs955533958     | 2e-7    | CE 20:5;0          | rs955533958     | 1e-8    |     |     |    |    |    |
| <i>RMDN2</i>      | 2   | 2        | rs182370326     | 1e-2    | PI 16:0;0_18:2;0   | rs182370326     | 4e-8    |     |     |    |    |    |
| <i>MAP4K4</i>     | 2   | 3        | rs61008604      | 2e-6    | PC 16:0;0_22:4;0   | rs61008604      | 5e-9    |     |     |    |    |    |
| <i>AC092646.2</i> | 2   | 11       | rs6709442       | 7e-6    | PC O-16:0;0/20:4;0 | rs6709442       | 3e-8    |     |     |    |    |    |
| <i>PARD3B</i>     | 2   | 4        | rs149768482     | 5e-3    | LPC 18:2;0         | rs149768482     | 1e-8    |     |     |    |    |    |
| <i>AC011233.1</i> | 2   | 5        | rs138313489     | 5e-8    | PI 18:1;0_18:1;0   | rs138313489     | 2e-4    |     |     |    |    |    |
| <i>LINC02005</i>  | 3   | 2        | rs1204981098    | 1e-4    | PE 16:0;0_18:2;0   | rs1204981098    | 5e-8    |     |     |    |    |    |
| <i>SORCS2</i>     | 4   | 10       | rs138588594     | 4e-4    | PC O-18:2;0/16:0;0 | rs138588594     | 3e-8    |     |     |    |    |    |
| <i>PCDH10</i>     | 4   | 3        | rs62311841      | 4e-6    | PC O-16:0;0/16:1;0 | rs62311841      | 3e-8    |     |     |    |    |    |
| <i>MIR548A1HG</i> | 6   | 5        | rs72021940      | 2e-7    | PC 18:1;0_18:1;0   | rs72021940      | 2e-9    |     |     |    |    |    |
| <i>MIR3144</i>    | 6   | 7        | rs184149665     | 2e-7    | CE 16:0;0          | rs184149665     | 2e-8    |     |     |    |    |    |
| <i>CNTNAP2</i>    | 7   | 2        | rs149545162     | 1e-3    | PE 18:1;0_18:1;0   | rs149545162     | 1e-8    |     |     |    |    |    |
| <i>DPP6</i>       | 7   | 3        | rs1391507096    | 3e-5    | PC 18:2;0_20:4;0   | rs1391507096    | 1e-8    |     |     |    |    |    |
| <i>TOX</i>        | 8   | 1        | rs7846649       | 5e-4    | TAG 53:4;0         | rs7846649       | 2e-8    |     |     |    |    |    |
| <i>SAMD12</i>     | 8   | 8        | rs28505920      | 9e-4    | Cer 40:1;2         | rs28505920      | 4e-8    |     |     |    |    |    |
| <i>EMG1</i>       | 12  | 11       | rs2041601       | 2e-8    | PC O-16:1;0/20:4;0 | rs2041601       | 1e-6    |     |     |    |    | X  |
| <i>SOX5</i>       | 12  | 10       | rs11047412      | 4e-8    | PC O-16:0;0/16:0;0 | rs11047412      | 6e-5    |     |     |    |    |    |
| <i>AC090017.1</i> | 12  | 2        | rs73120814      | 4e-5    | PE 18:0;0_18:2;0   | rs73120814      | 4e-8    |     |     |    |    |    |
| <i>LINC01619</i>  | 12  | 2        | rs73215839      | 1e-4    | PC 18:0;0_18:3;0   | rs73215839      | 4e-8    |     |     |    |    |    |
| <i>SCARB1</i>     | 12  | 11       | rs11057853      | 1e-4    | PC O-18:1;0/20:4;0 | rs11057853      | 2e-8    | X   |     |    |    |    |
| <i>CAB39L</i>     | 13  | 4        | rs75654243      | 1e-4    | LPC 18:2;0         | rs75654243      | 2e-8    |     |     |    |    |    |
| <i>ABHD2</i>      | 15  | 3        | rs293396        | 8e-9    | PC 18:2;0_20:4;0   | rs1033155       | 2e-8    | X   |     |    | X  |    |
| <i>MSRBI</i>      | 16  | 7        | rs147549994     | 7e-6    | PC 18:0;0_20:4;0   | rs147549994     | 1e-8    |     |     |    |    |    |
| <i>ZFHX3</i>      | 16  | 2        | rs117210444     | 1e-5    | PI 18:1;0_20:4;0   | rs117210444     | 9e-9    |     |     |    |    |    |
| <i>G6PC</i>       | 17  | 8        | rs201961848     | 6e-5    | Cer 40:1;2         | rs201961848     | 4e-8    |     |     |    |    |    |
| <i>AQP4-AS1</i>   | 18  | 7        | rs62081852      | 9e-5    | PC 16:0;0_20:2;0   | rs62081852      | 9e-9    |     |     |    |    |    |
| <i>DCC</i>        | 18  | 3        | rs147797702     | 5e-7    | PC 18:1;0_20:4;0   | rs147797702     | 4e-8    |     |     |    |    |    |
| <i>UCA1</i>       | 19  | 7        | rs55660824      | 3e-5    | CE 18:0;0          | rs55660824      | 5e-8    |     | X   | X  |    |    |

*uv* univariate, *mv* multivariate, *Chr* chromosome, *minP* minimum of *P*-values of *mv* or *uv* GWAS

*uv trait* lipid species, *mv trait* cluster number, *LS* lipid species, *lead variant* rsid

Associations not reaching the Bonferroni corrected significance level are shown. Loci found by previous studies for standard lipids or lipid species are marked with an X. Loci are listed as italic gene names. Novel loci are bolded.

**Supplementary Table 2. Representative variants from FINEMAP for novel loci.**

| Locus         | Trait           | CS | Variant       | PIP  | Function                              | Gene            |
|---------------|-----------------|----|---------------|------|---------------------------------------|-----------------|
| <i>DTL</i>    | cluster 5       | 1  | rs571587214-A | 0.30 | intergenic                            |                 |
|               |                 | 2  | rs72747044-C* | 0.16 | 3'-UTR                                | <i>LPGAT1</i>   |
| <i>STK39</i>  | cluster 8       | 1  | rs143928330-G | 1    | intergenic                            |                 |
|               |                 | 2  | rs182274987-G | 0.56 | 3'-UTR                                | <i>CERS6</i>    |
|               |                 | 3  | rs6728199-T*  | 0.09 | intergenic                            |                 |
| <i>CDS1</i>   | cluster 2       | 1  | rs191460656-T | 0.62 | intron                                | <i>CDS1</i>     |
| <i>AGPAT2</i> | PC16:0;0_22:5;0 | 1  | rs2236514-C   | 0.96 | intron                                | <i>AGPAT2</i>   |
| <i>AGPAT2</i> | cluster 3       | 1  | rs2236514-C   | 0.99 | intron                                | <i>AGPAT2</i>   |
| <i>SGPL1</i>  | Cer42:2;2       | 1  | rs12763964-C  | 0.59 | intron                                | <i>SGPL1</i>    |
|               |                 | 2  | rs7091934-T*  | 0.05 | non coding transcript<br>exon variant | <i>MTND2P15</i> |
| <i>SGPL1</i>  | cluster 8       | 1  | rs12763964-C  | 1    | intron                                | <i>SGPL1</i>    |
|               |                 | 2  | rs35541340-A  | 0.94 | upstream gene                         | <i>PCBD1</i>    |
|               |                 | 3  | rs1538680-A*  | 0.27 | intron                                | <i>TBATA</i>    |
| <i>YPEL2</i>  | cluster 11      | 1  | rs149807191-T | 0.30 | intron                                | <i>YPEL2</i>    |
|               |                 | 2  | rs12944342-T* | 0.42 | intron                                | <i>GDPD1</i>    |
|               |                 | 3  | rs8081886-T*  | 0.06 | intergenic                            |                 |
| <i>KCNJ12</i> | cluster 7       | 1  | rs1320254-C   | 0.44 | intron                                | <i>KCNJ12</i>   |
| <i>SPHK2</i>  | cluster 8       | 1  | rs61751862-C  | 1    | missense                              | <i>SPHK2</i>    |
|               |                 | 2  | rs430989-G*   | 0.18 | non coding transcript<br>exon variant | <i>RPL18</i>    |
| <i>NINL</i>   | cluster 3       | 1  | rs796307480-G | 0.01 | inframe deletion                      | <i>NINL</i>     |
| <i>AGPAT3</i> | cluster 3       | 1  | rs62229686-T  | 1    | missense                              | <i>AGPAT3</i>   |

*Variant* rsid-minor allele, *Function* variant function from VEP, *Gene* gene name from VEP in italic  
\* variant of uninformative credible set (minimum LD < 0.1)

Representative variants (top variant or functional variant in LD with  $r^2 > 0.95$ ) of the credible sets for the most probable number of causal variants are listed. Loci are listed as italic gene names.

**Supplementary Table 3. Basic characteristics of the GeneRISK study cohort.**

|                                             | Women       | Men         |
|---------------------------------------------|-------------|-------------|
| <i>N</i>                                    | 4642        | 2624        |
| Age (years)                                 | 55.7 (5.7)  | 55.9 (5.9)  |
| BMI (kg/m <sup>2</sup> )                    | 27.2 (5.3)  | 27.6 (4.4)  |
| BMI <25 kg/m <sup>2</sup> ( <i>N</i> (%))   | 1771 (38.2) | 731 (27.9)  |
| BMI 25-30 kg/m <sup>2</sup> ( <i>N</i> (%)) | 1730 (37.3) | 1253 (47.8) |
| BMI ≥30 kg/m <sup>2</sup> ( <i>N</i> (%))   | 1133 (24.5) | 636 (24.3)  |
| Diabetes ( <i>N</i> (%))                    | 268 (5.8)   | 242 (9.2)   |
| Current smokers ( <i>N</i> (%))             | 701 (15.1)  | 555 (21.2)  |
| Lipid lowering medication ( <i>N</i> (%))   | 432 (9.3)   | 373 (14.2)  |
| LDL-C (mmol/l)                              | 3.31 (0.94) | 3.44 (0.92) |
| HDL-C (mmol/l)                              | 1.79 (0.50) | 1.43 (0.45) |
| TG (mmol/l)                                 | 1.15 (0.65) | 1.49 (1.18) |
| TC (mmol/l)                                 | 5.61 (1.04) | 5.52 (1.02) |

*N* number

Data are listed as mean (standard deviation) or number (percentage).

**Supplementary Table 4. Simulation results for rare or low-frequency variants.**

| variant     | cluster | MAF  | lambda<br>run1<br>run2 | <i>P</i> | Corr. <i>P</i> | minP<br>run1<br>run2 | Corr. minP<br>run1<br>run2 | Prop. <i>P</i> < 0.01<br>run1<br>run2 | Corr. prop. <i>P</i> < 0.01<br>run1<br>run2 |
|-------------|---------|------|------------------------|----------|----------------|----------------------|----------------------------|---------------------------------------|---------------------------------------------|
| rs77024033  | 4       | 0.5% | 1.06<br>1.05           | 3e-8     | 8e-8           | 2e-6<br>1e-6         | 3e-6<br>3e-6               | 1.27%,<br>1.32%                       | 1.03%<br>1.10%                              |
| rs4986970   | 7       | 2.8% | 1.06<br>1.06           | 1e-16    | 8e-16          | 4e-6<br>4e-6         | 7e-6<br>8e-6               | 1.21%<br>1.22%                        | 0.96%<br>1.00%                              |
| rs61751862  | 8       | 3.1% | 1.06<br>1.07           | 6e-16    | 5e-15          | 4e-6<br>6e-7         | 7e-6<br>1e-6               | 1.21%<br>1.21%                        | 0.97%<br>0.96%                              |
| rs143928330 | 8       | 3.1% | 1.05<br>1.05           | 3e-10    | 8e-10          | 9e-7<br>4e-6         | 2e-6<br>7e-6               | 1.14%<br>1.16%                        | 0.97%<br>0.95%                              |
| rs116329252 | 5       | 4.2% | 1.04<br>1.05           | 4e-11    | 1e-10          | 1e-6<br>2e-5         | 2e-6<br>3e-5               | 1.09%<br>1.15%                        | 0.93%<br>0.97%                              |

$\lambda$  Genomic inflation factor estimated from simulation *P* multivariate *P*-value (two-sided *P*-value calculated using canonical correlation analysis) *Corr. P* multivariate *P*-value corrected by the mean of  $\lambda$  estimated from the simulations *minP* minimum *P*-value reached in simulation *Corr. minP* minimum *P*-value reached in simulation after correction by  $\lambda$  *Prop. P* < 0.01 Proportion of *P*-values which is < 0.01, *Corr. prop. P* < 0.01 Proportion of *P*-values which is < 0.01 after correction by  $\lambda$

## Supplementary Figures

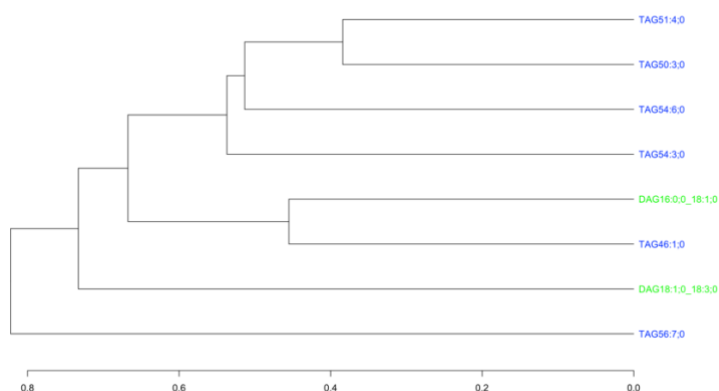

**Supplementary Figure 1. Dendrogram for hierarchical clustering of lipid species of the lipid classes TAG and DAG.** Only lipid species with pairwise correlations  $< 0.8$  were included. All lipid species are contained in cluster 1.

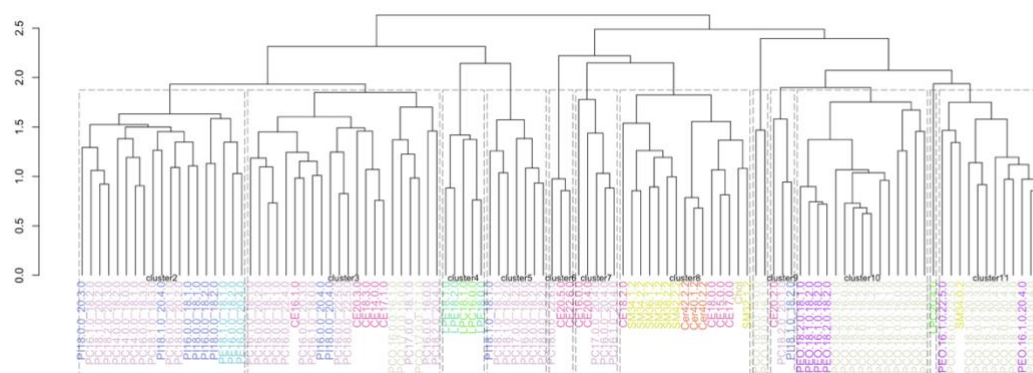

**Supplementary Figure 2. Dendrogram for hierarchical clustering of lipid species of the lipid classes CE, Cer, Chol, LPC, LPE, PC, PCO, PE, PEO, PI and SM.** Only lipid species with pairwise correlations  $< 0.8$  were included. Lipid species contained in a cluster for multivariate analysis are surrounded by rectangles and labeled by cluster name.

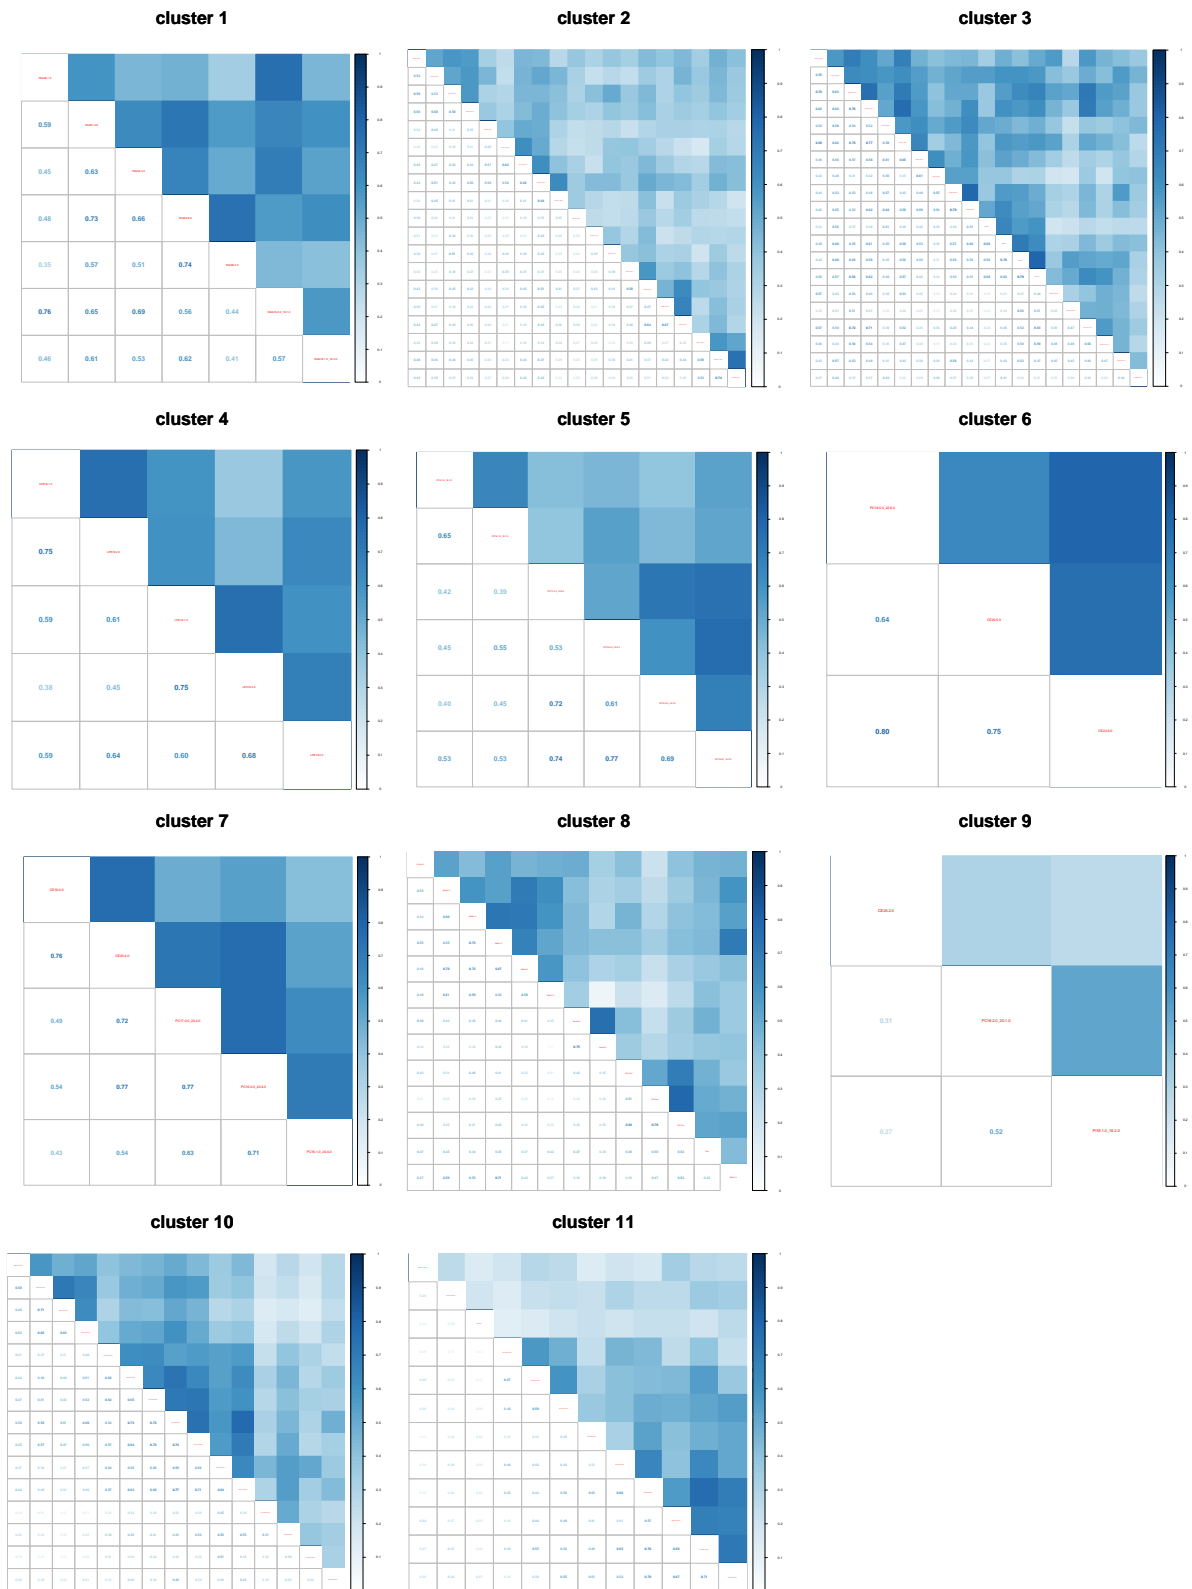

**Supplementary Figure 3. Heatmaps of absolute pairwise Pearson correlations for lipid species included in a specific cluster.**



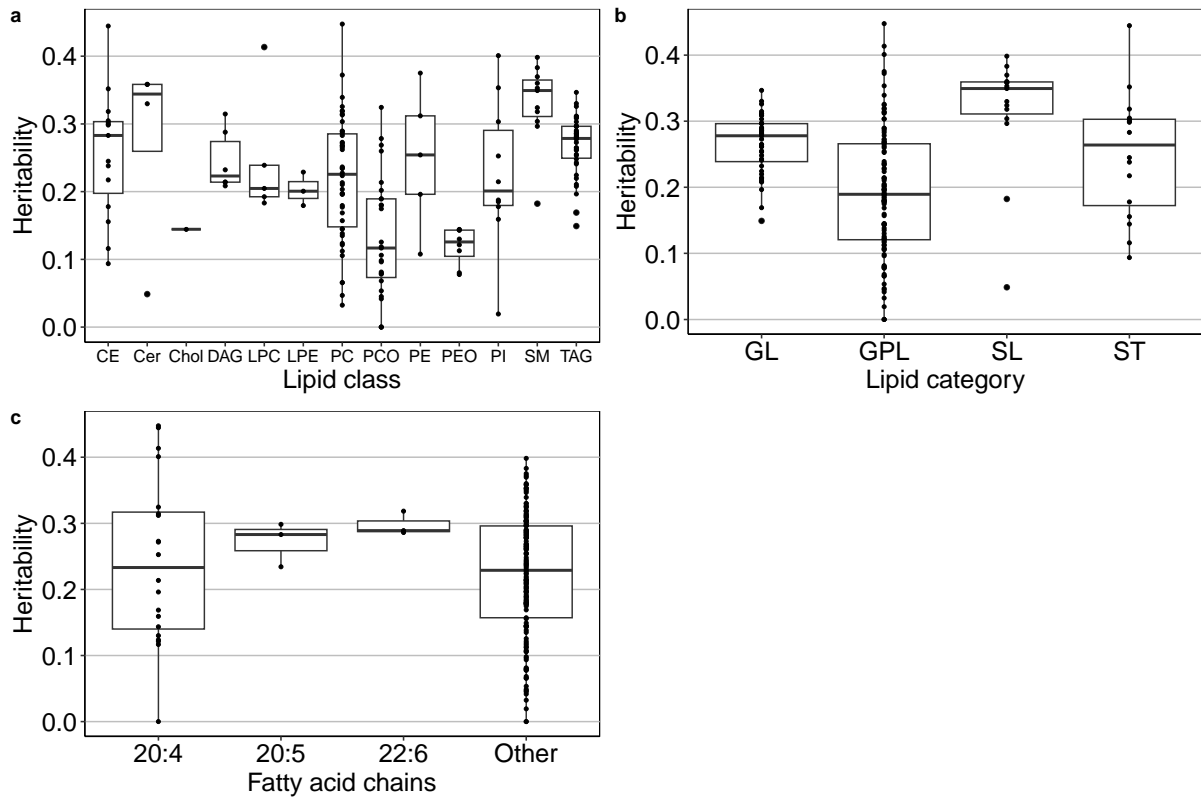

**Supplementary Figure 4.** Box plots of heritability estimates between species of different lipid classes (a), lipid categories (b) and species containing specific fatty acid chains (c). The boxplots depict the median (middle line), interquartile range (IQR) defining the bounds of the box, and whiskers extending to the largest/smallest values no further than 1.5 times the IQR. Data beyond the end of whiskers are plotted individually. Heritability estimation was performed using  $n=7,174$  biologically independent samples. The number of lipid species per lipid class/lipid category/species containing specific fatty acid chains is: 15 (CE), 4 (Cer), 1 (Chol), 6 (DAG), 5 (LPC), 3 (LPE), 46 (PC), 27 (PCO), 5 (PE), 8 (PEO), 10 (PI), 11 (SM), 38 (TAG); 44 (GL), 104 (GPL), 15 (SL), 16 (ST); 20:4 (20), 20:5 (3), 22:6 (3).

### CE

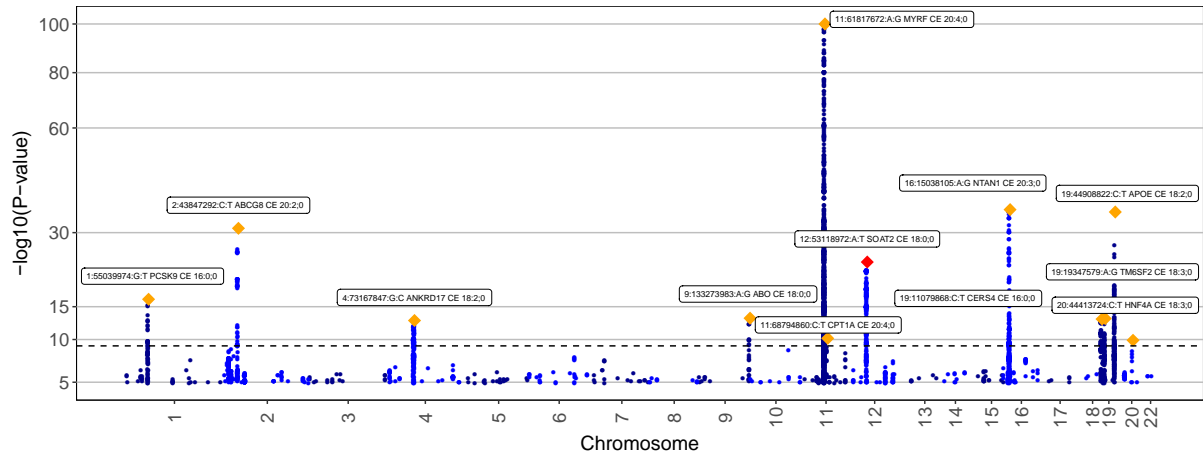

### Cer

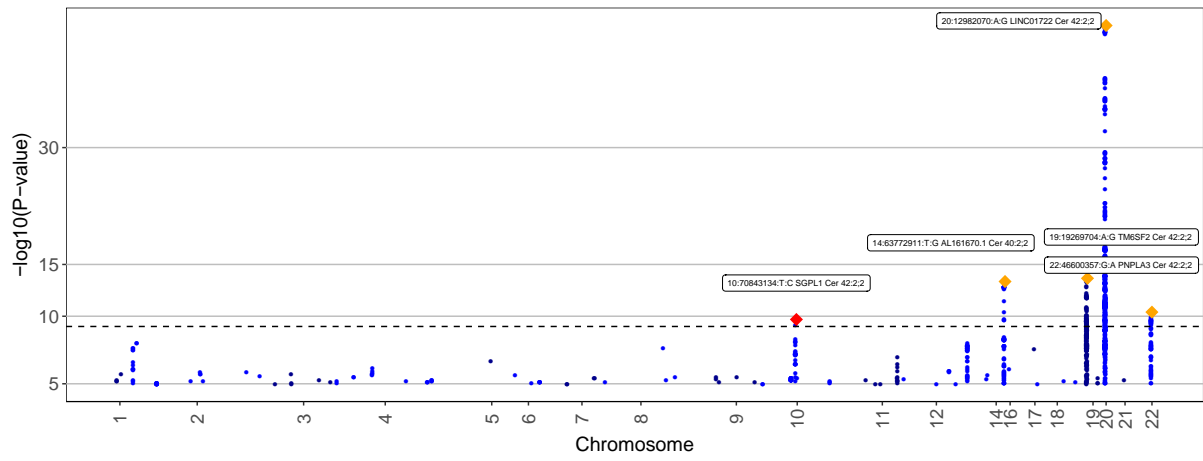

### Chol

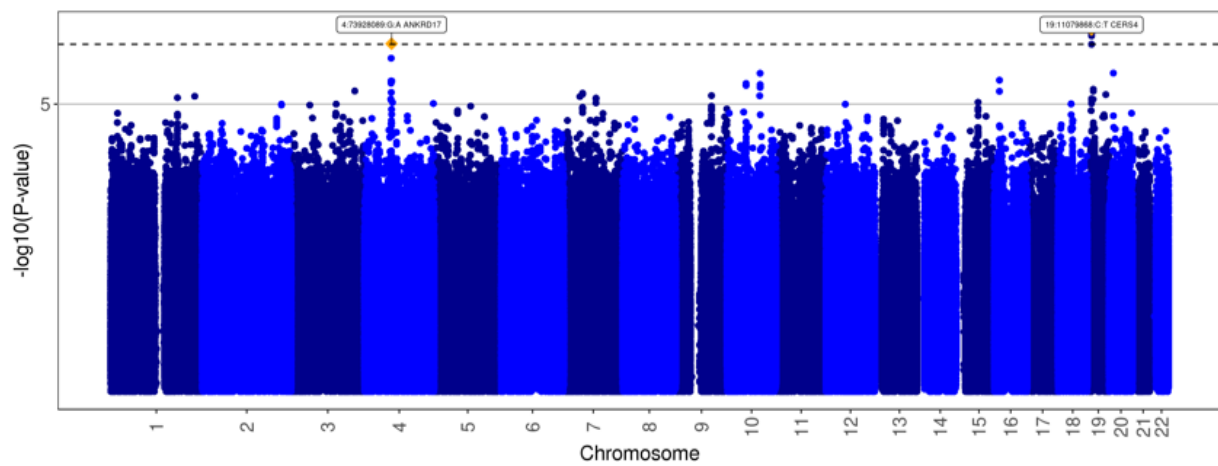

## DAG

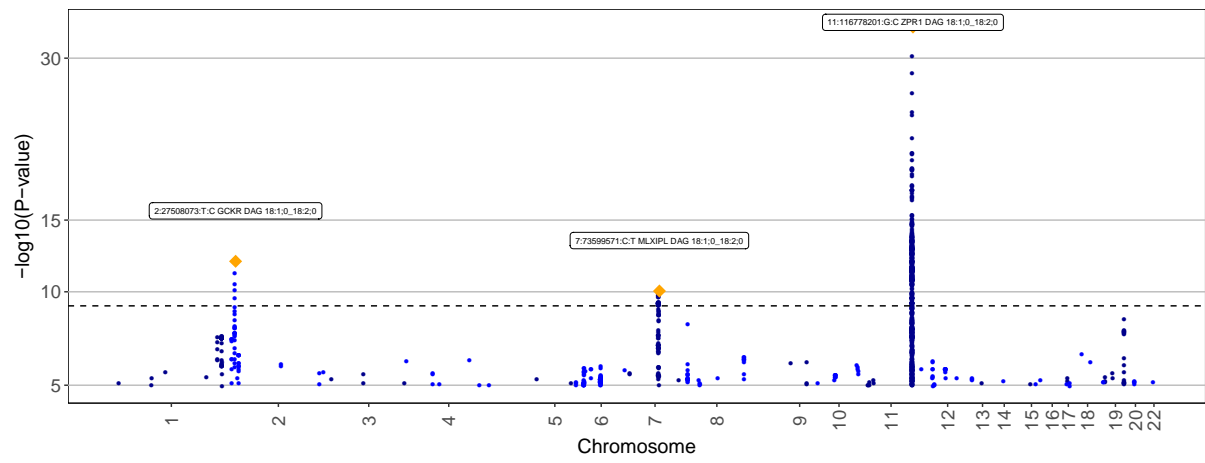

## LPC

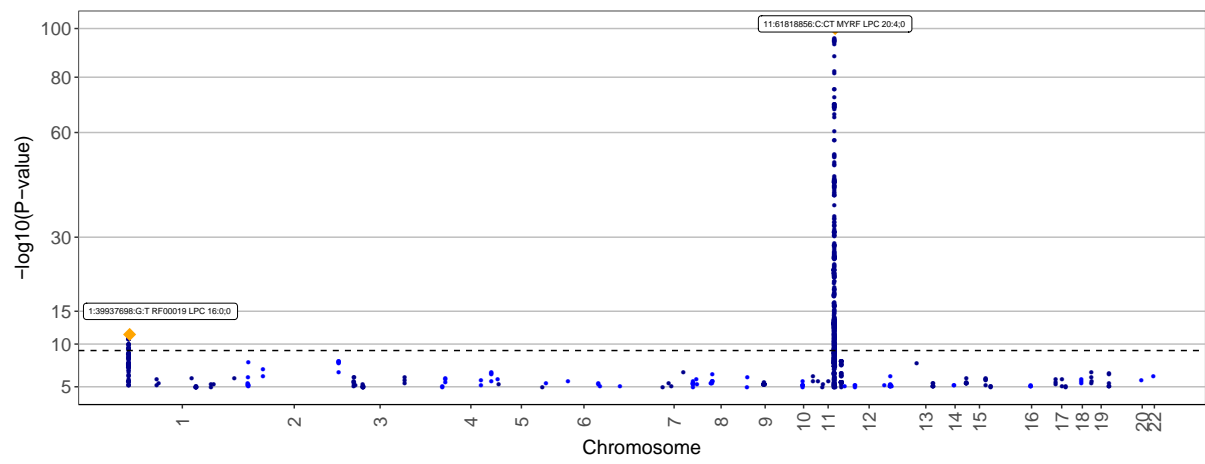

## LPE

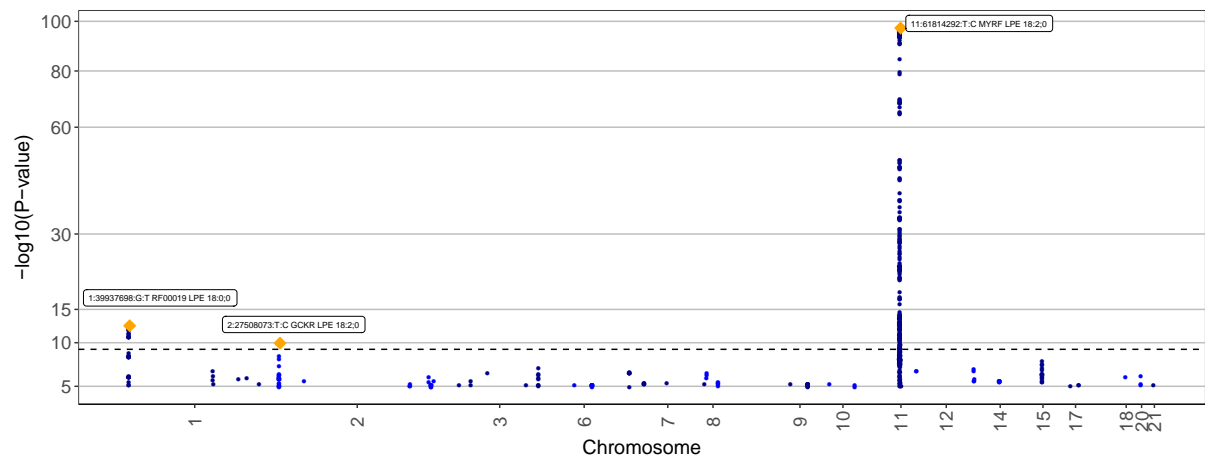

### PC

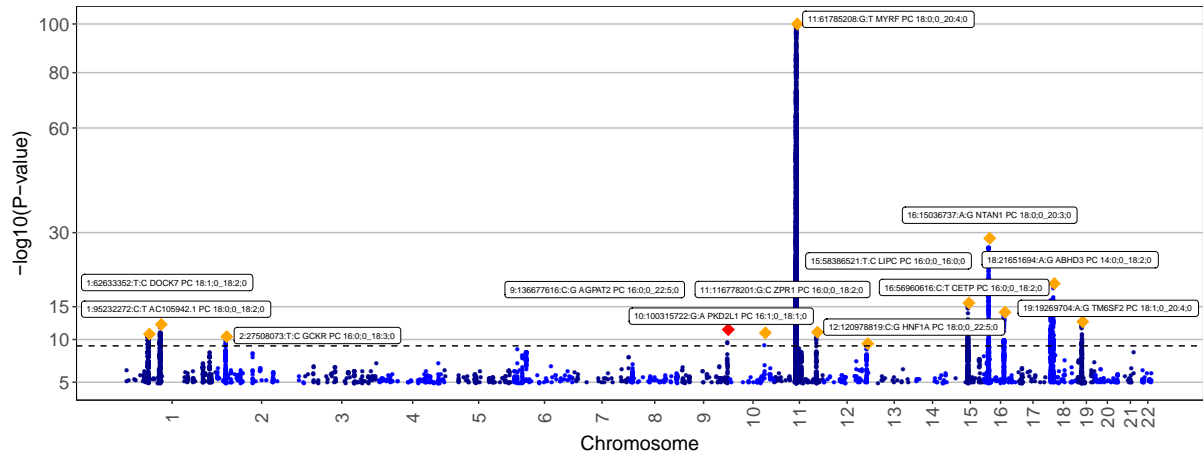

### PCO

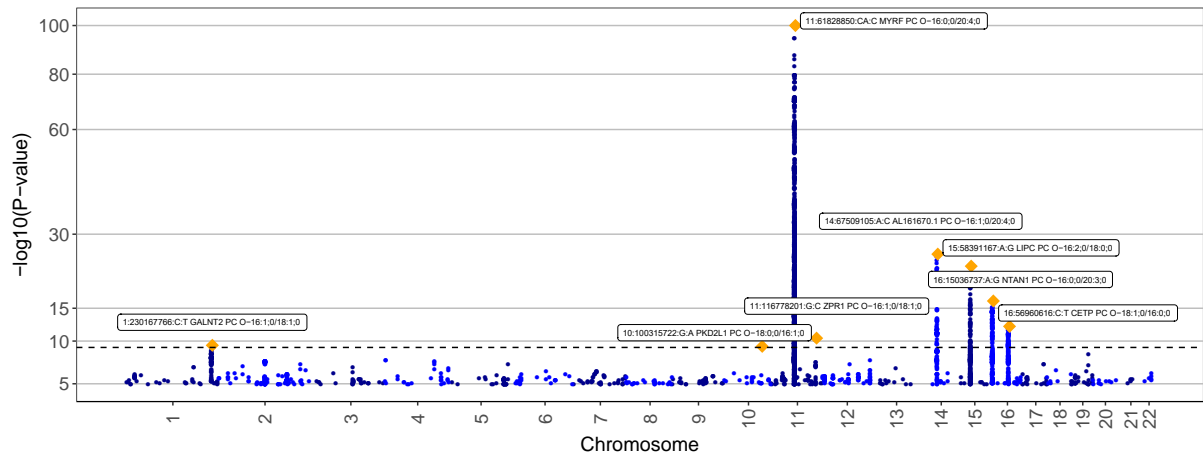

### PE

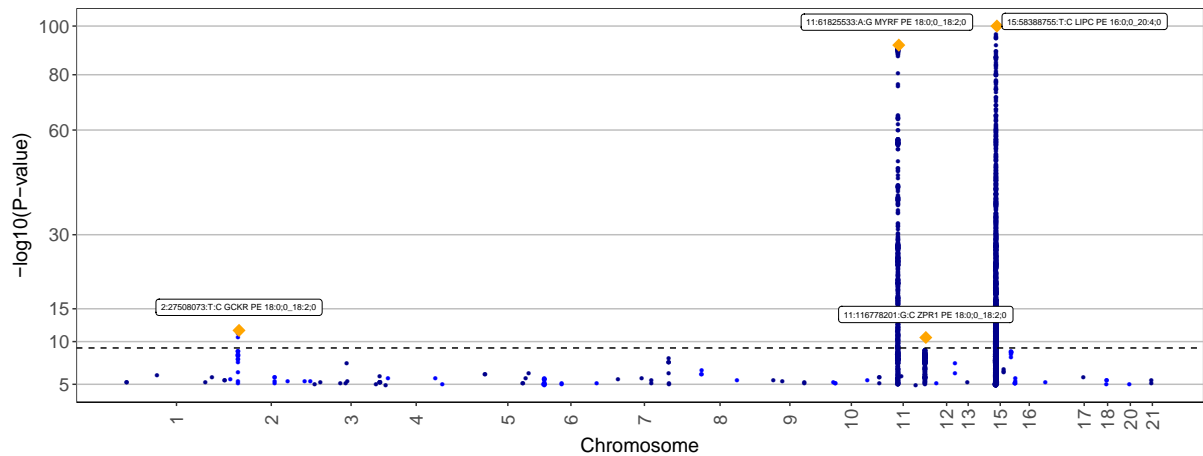

## PEO

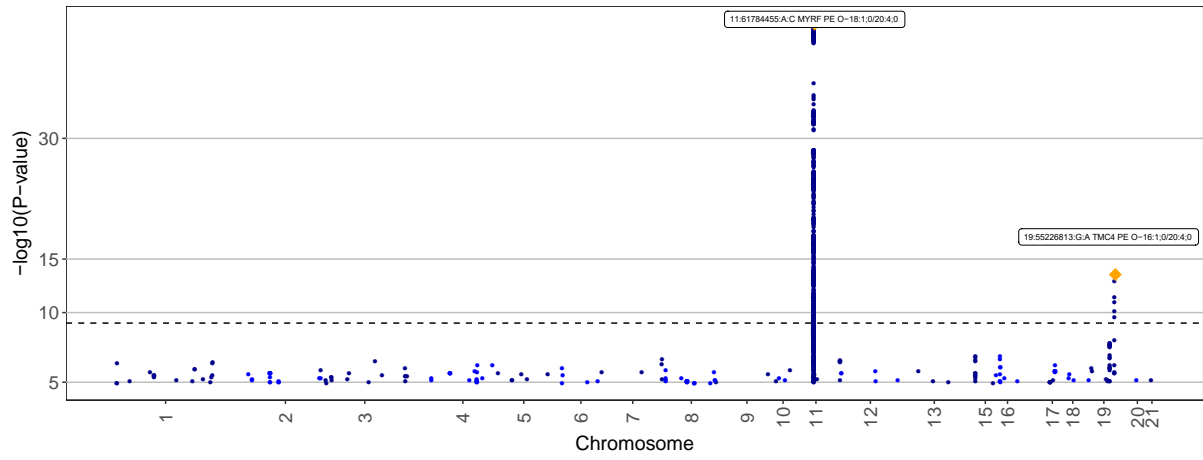

## PI

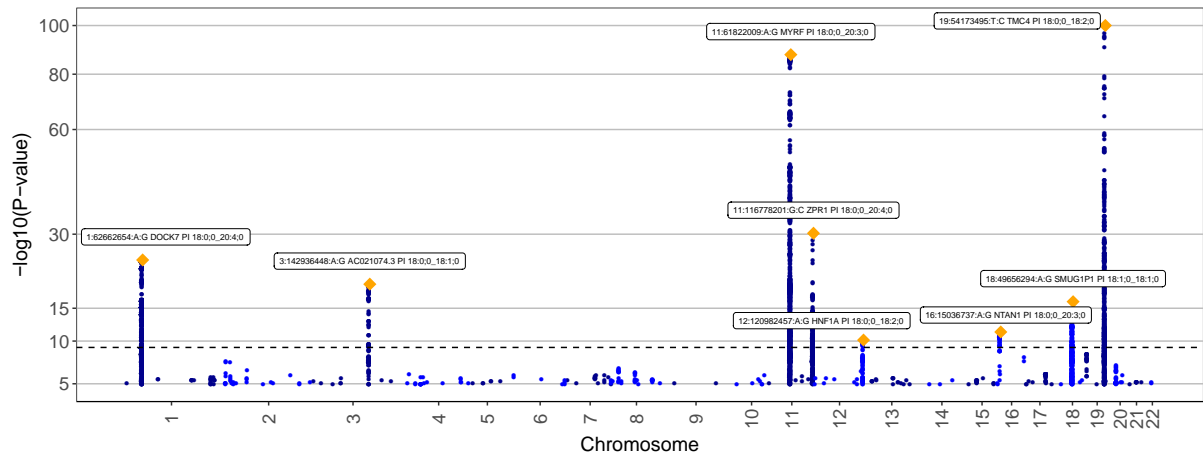

## SM

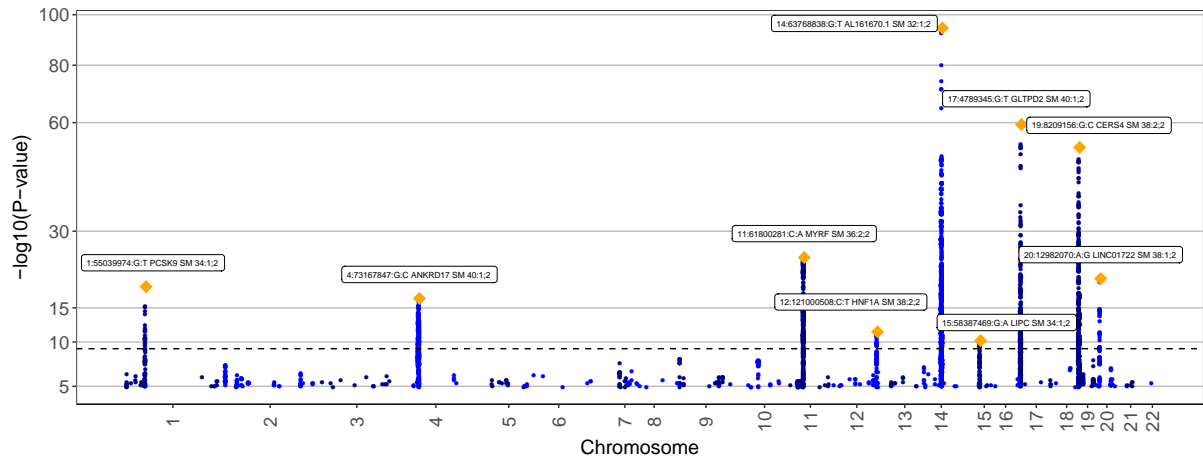

## TAG

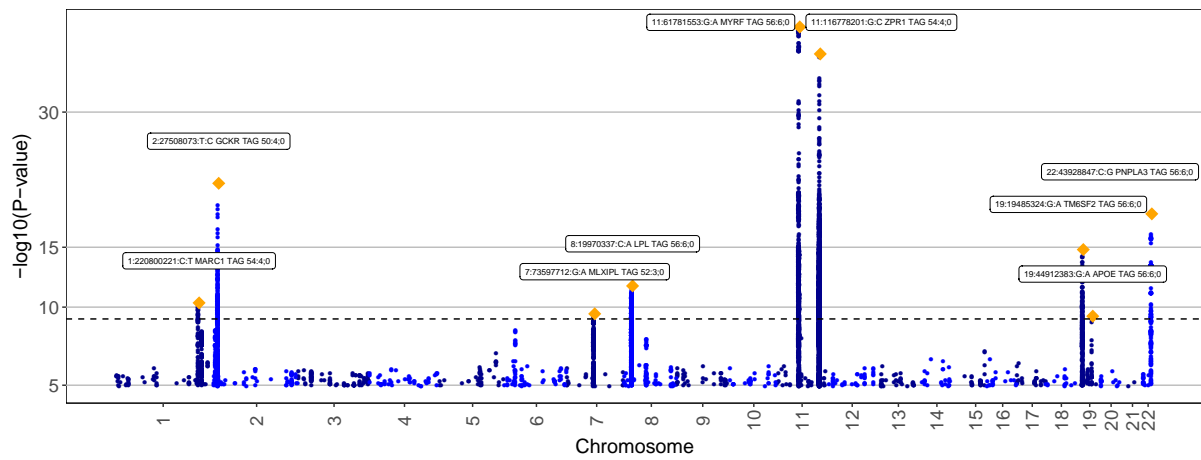

**Supplementary Figure 5. Manhattan plots for lipid classes.** Top associations reaching Bonferroni-corrected  $P$ -value threshold of  $7.352941e-10$  are depicted as diamonds and annotated by variant, locus name and lipid species. Known loci are colored yellow and novel loci are colored red. The vertical line indicates the Bonferroni-corrected  $P$ -value threshold. Only variants with  $P$ -value  $< 1e-5$  are shown. The y-axis is capped at 100. Two-sided  $P$ -values calculated using a linear-mixed-model are reported.

cluster 1

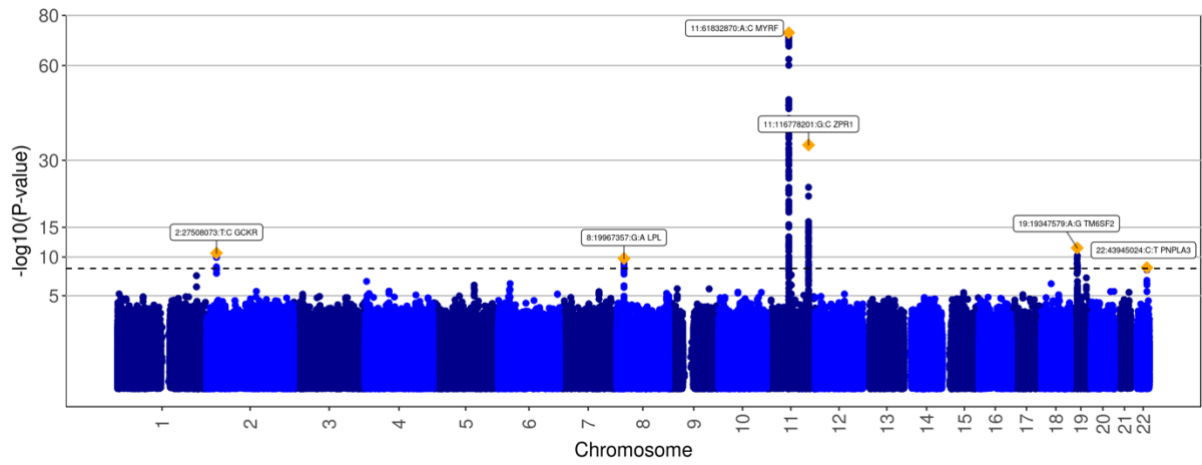

cluster 2

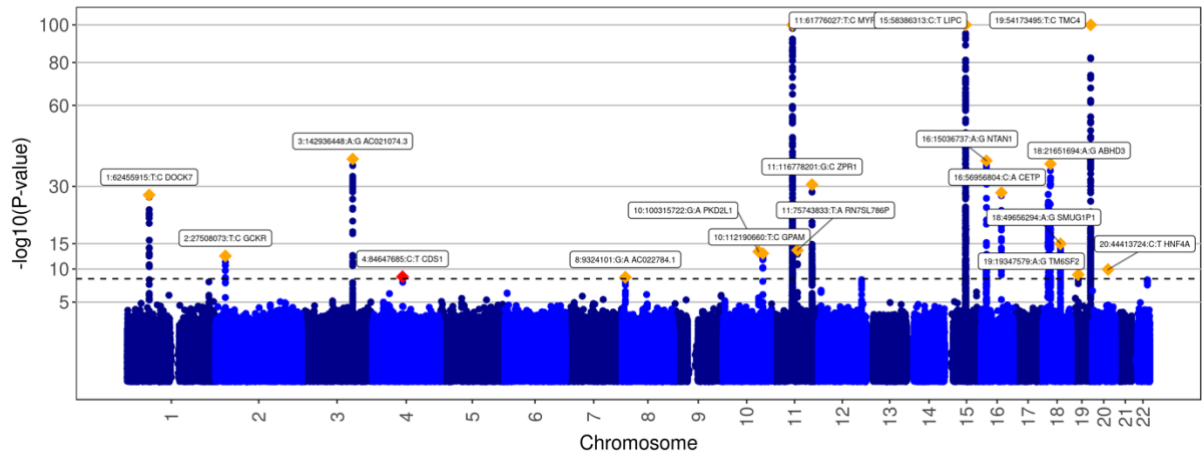

cluster 3

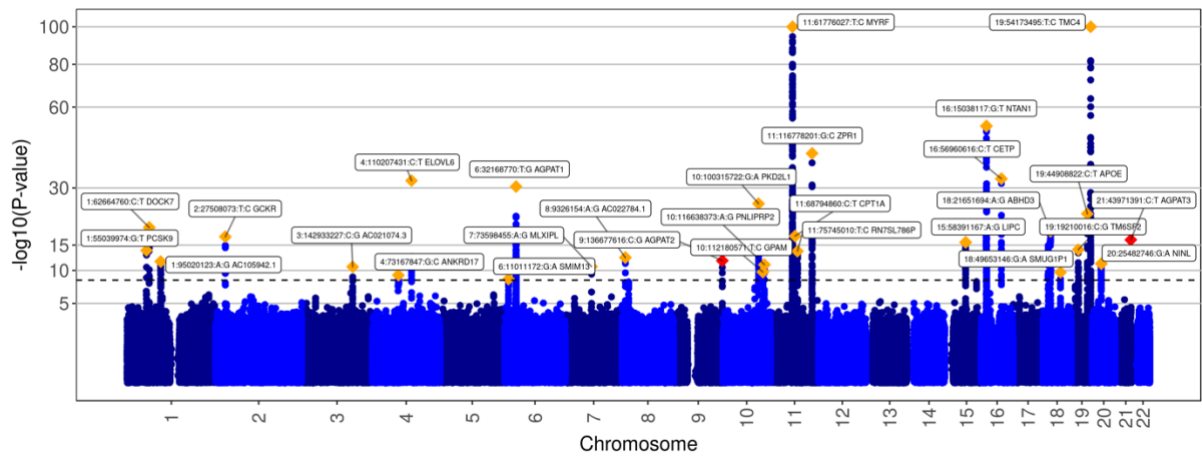

cluster 4

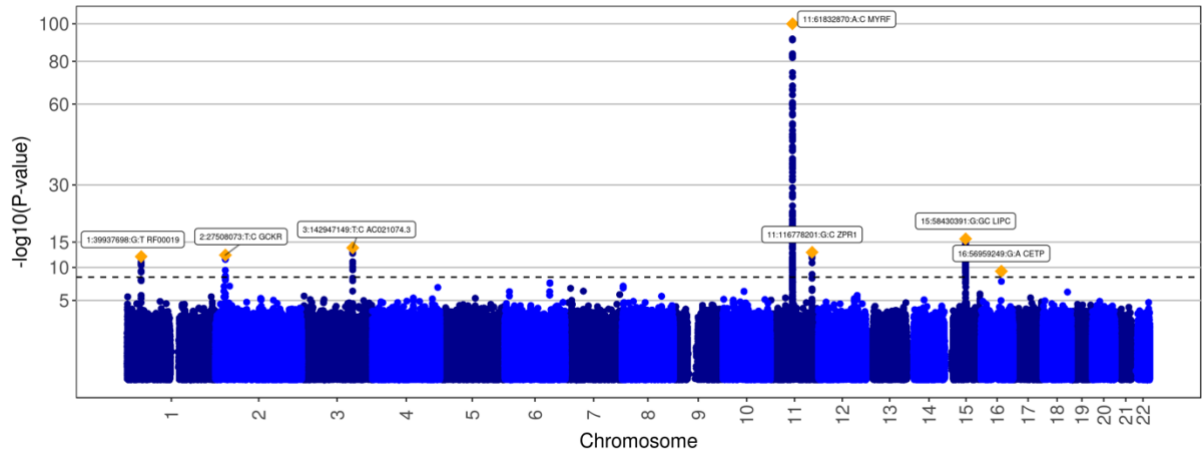

cluster 5

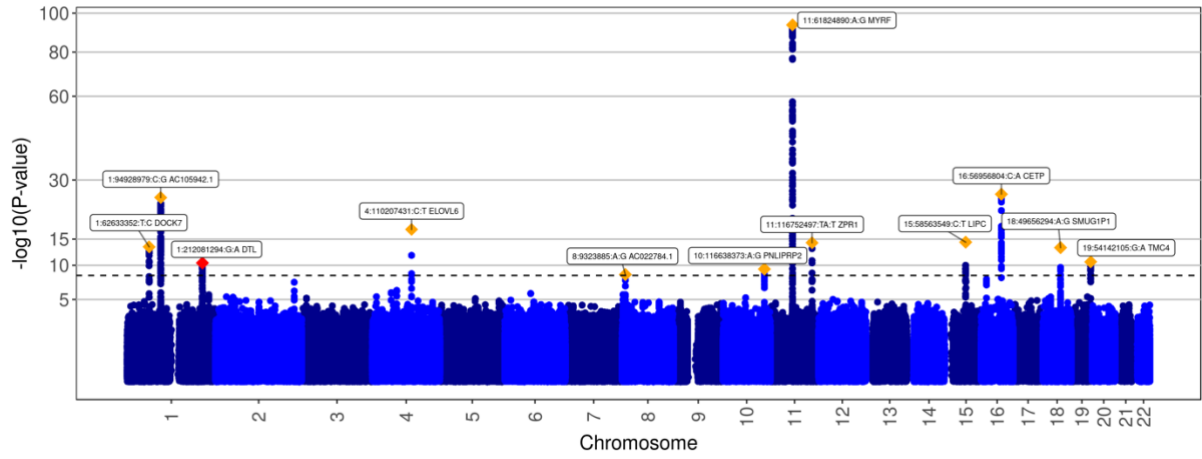

cluster 6

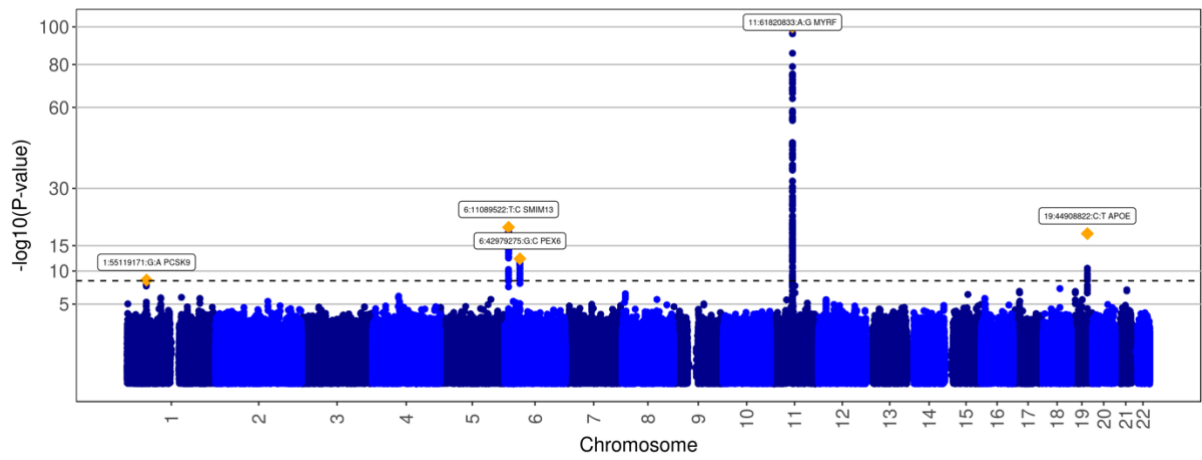



cluster 7

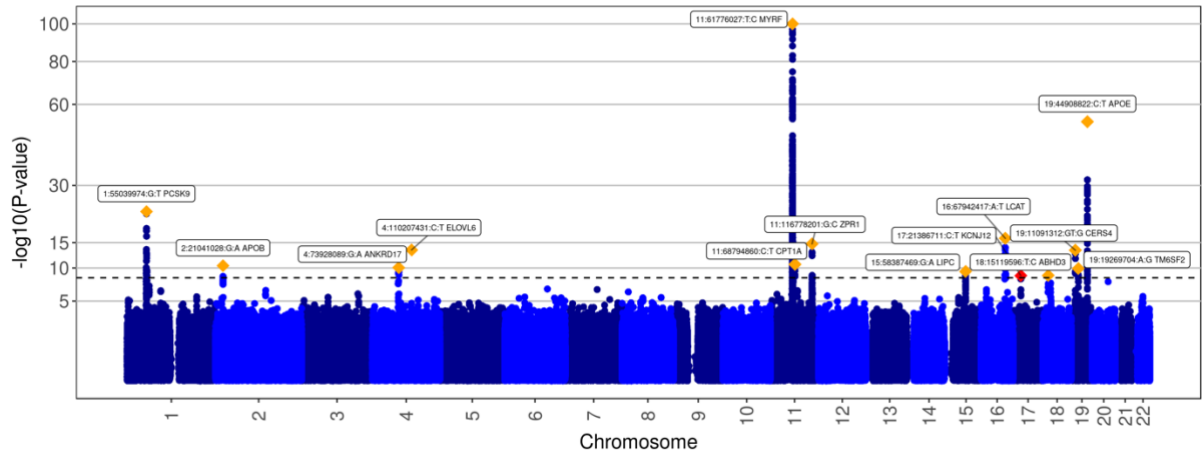

cluster 8

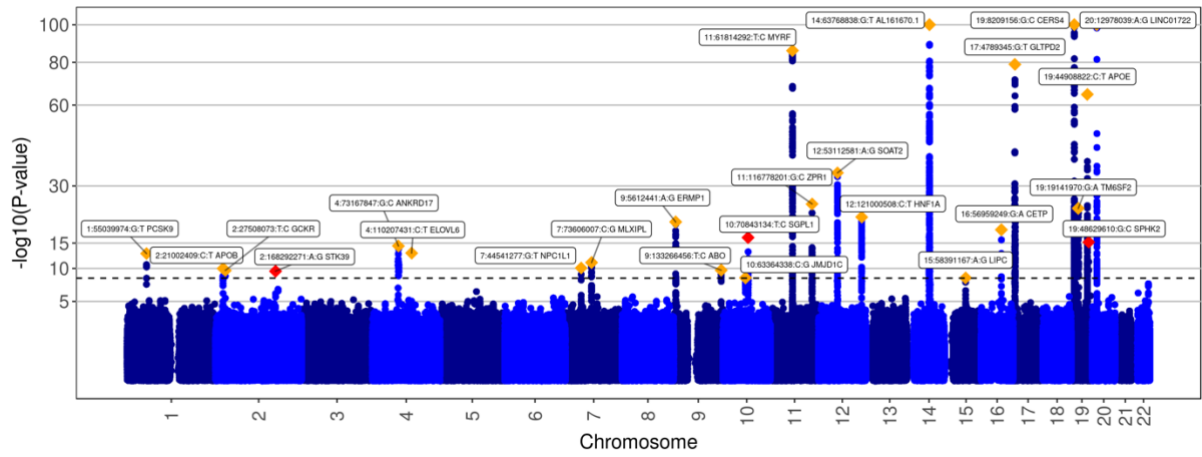

cluster 9

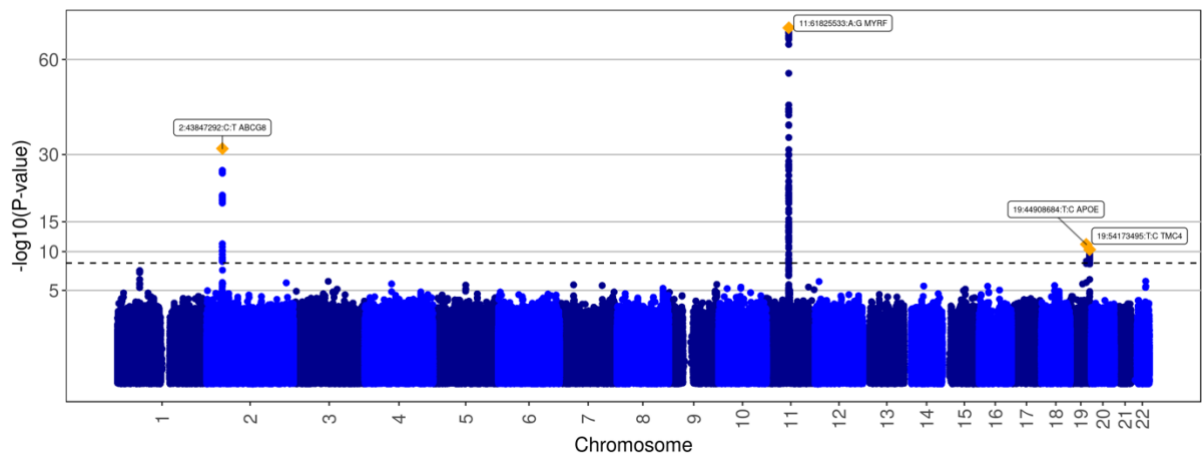

### cluster 10

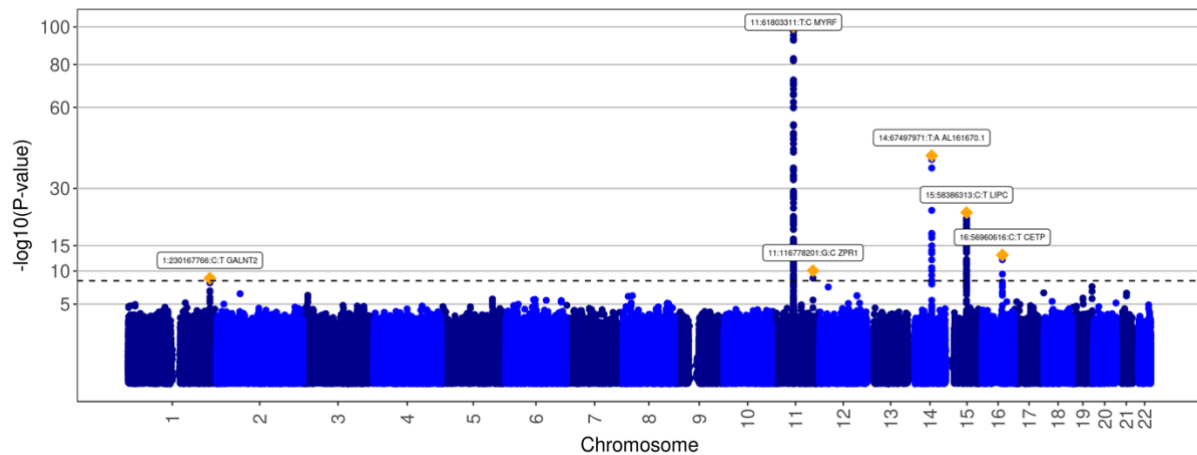

### cluster 11

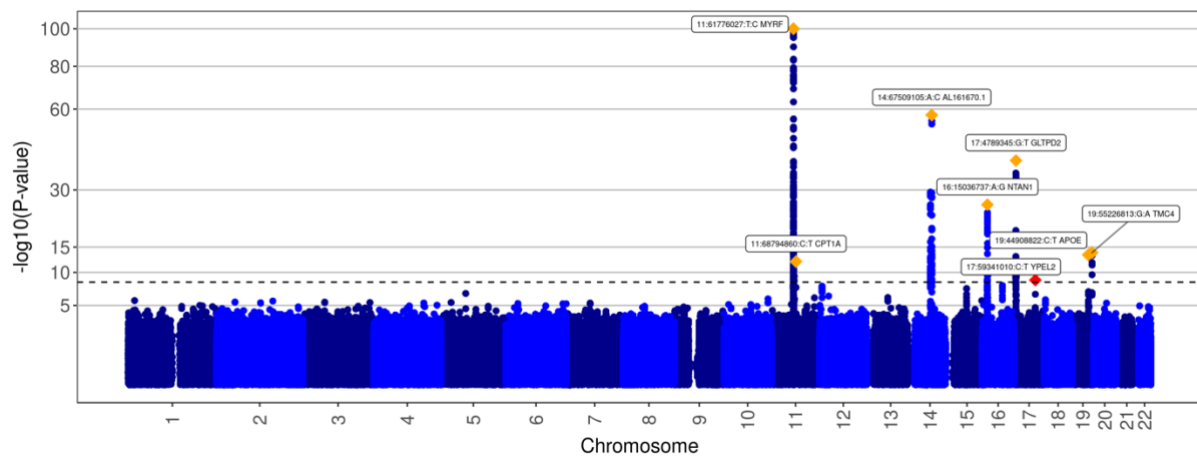

### Supplementary Figure 6. Manhattan plots for multivariate clusters

Top associations for signals reaching the Bonferroni-corrected  $P$ -value threshold of  $4.545455e-9$  are depicted as diamonds and annotated by variant and locus name. Known loci are colored yellow and novel loci are colored red. The vertical line indicates the Bonferroni-corrected  $P$ -value threshold. Two-sided  $P$ -values calculated using canonical correlation analysis (mv) are reported.

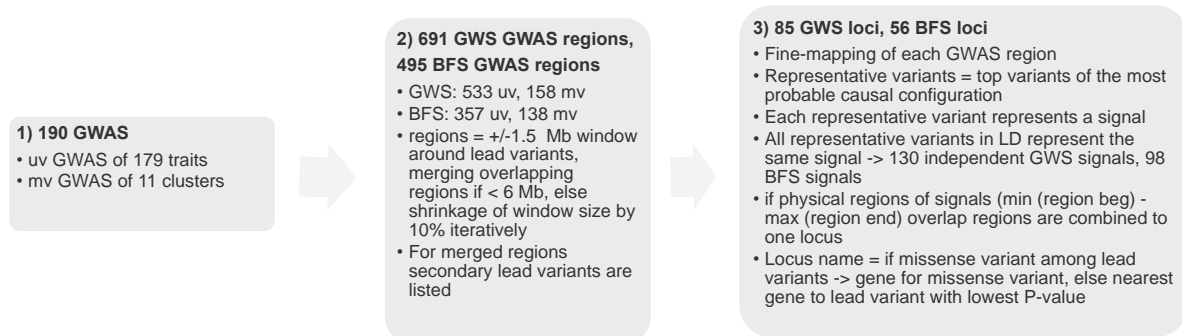

**Supplementary Figure 7. Flowchart of the locus definition process.** Numbers of GWAS regions and loci reaching the genome-wide significance (GWS) threshold and the Bonferroni-corrected significance (BFS) threshold are given for univariate (uv) and multivariate (mv) GWAS.

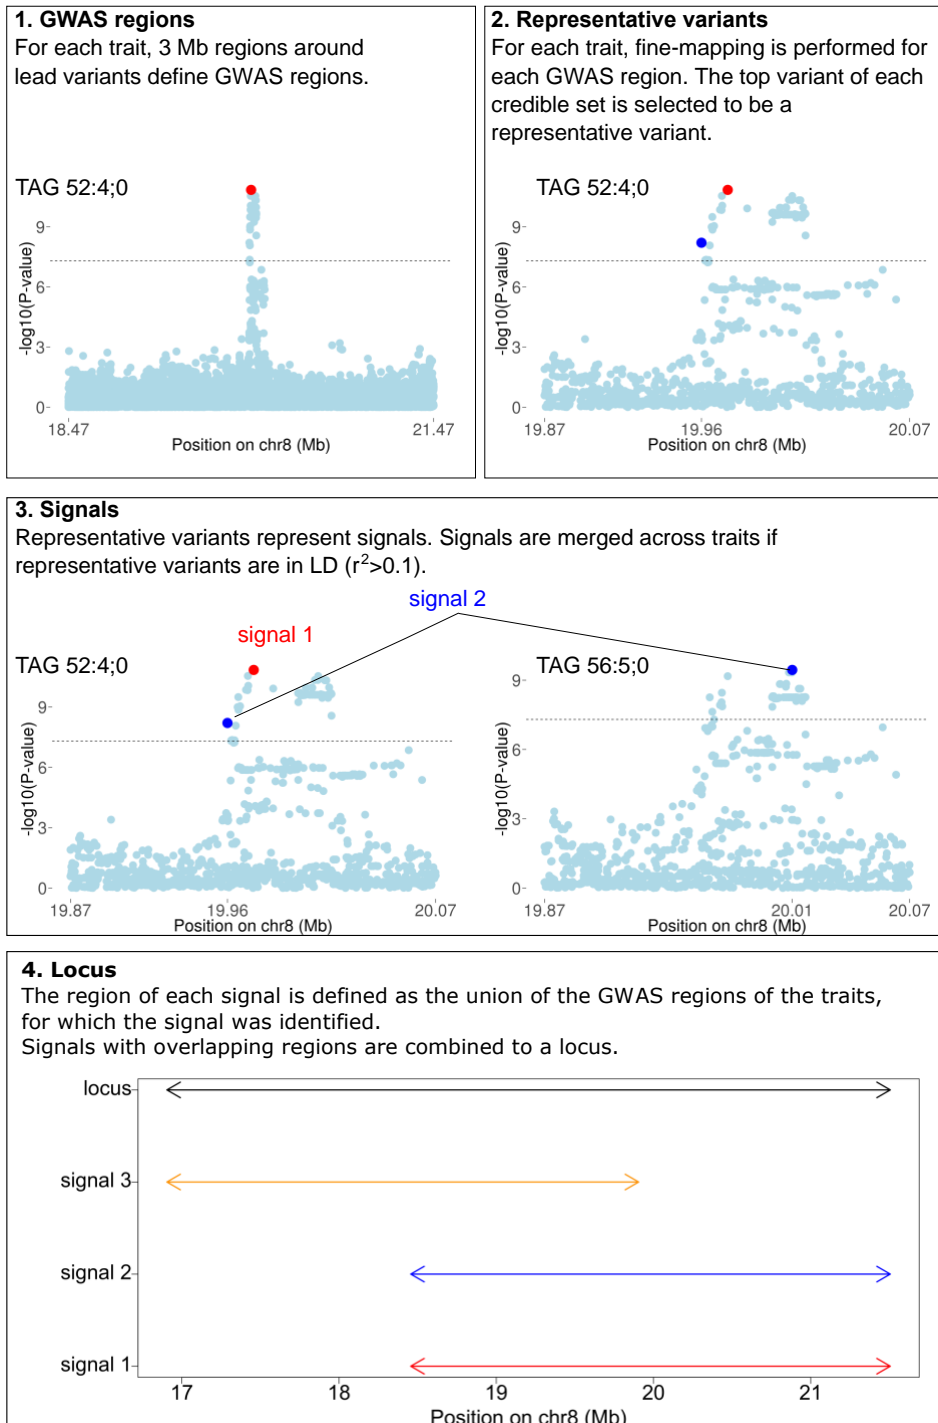

**Supplementary Figure 8. Locus definition process for locus *LPL*.** 1.  $P$ -values of variants in the 3 Mb GWAS region around lead variant (colored red) for TAG 52:4;0. Two-sided  $P$ -values calculated using a linear-mixed-model are shown. Not shown here: overlapping GWAS regions are merged (see Methods). 2.  $P$ -values of variants in 0.2 Mb window around the lead variant for TAG 52:4;0. Representative variants are colored (red and blue), the red representative variant is also the lead variant. 3.  $P$ -values of variants in 0.2 Mb window around the lead variant for TAG 52:4;0 and  $P$ -values in the same region for TAG 56:5;0. The representative variant for TAG 56:5;0 (blue) is in LD with the blue representative variant for TAG 52:4;0 and therefore represents the same signal (signal 2). The position of the representative variant of signal 2 (blue) is marked for both traits. 4. Regions of the signals and the locus.

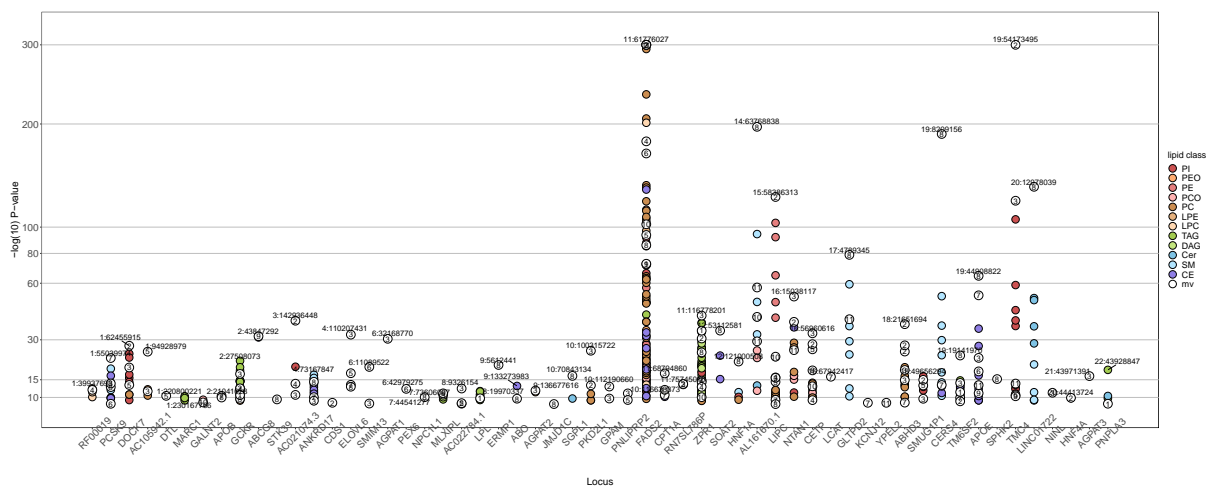

**Supplementary Figure 9. Univariate and multivariate  $P$ -values for loci reaching Bonferroni-corrected threshold of  $7.352941e-10$ .** Loci are colored by lipid class in univariate analysis and labeled by cluster number from multivariate analysis. The top variant for each locus is annotated by chromosome:base pair position (GRCh38). Lipid class names are listed in Figure 1. The y-axis is capped at 300. Two-sided  $P$ -values calculated using a linear-mixed-model (uv) and canonical correlation analysis (mv) are reported.

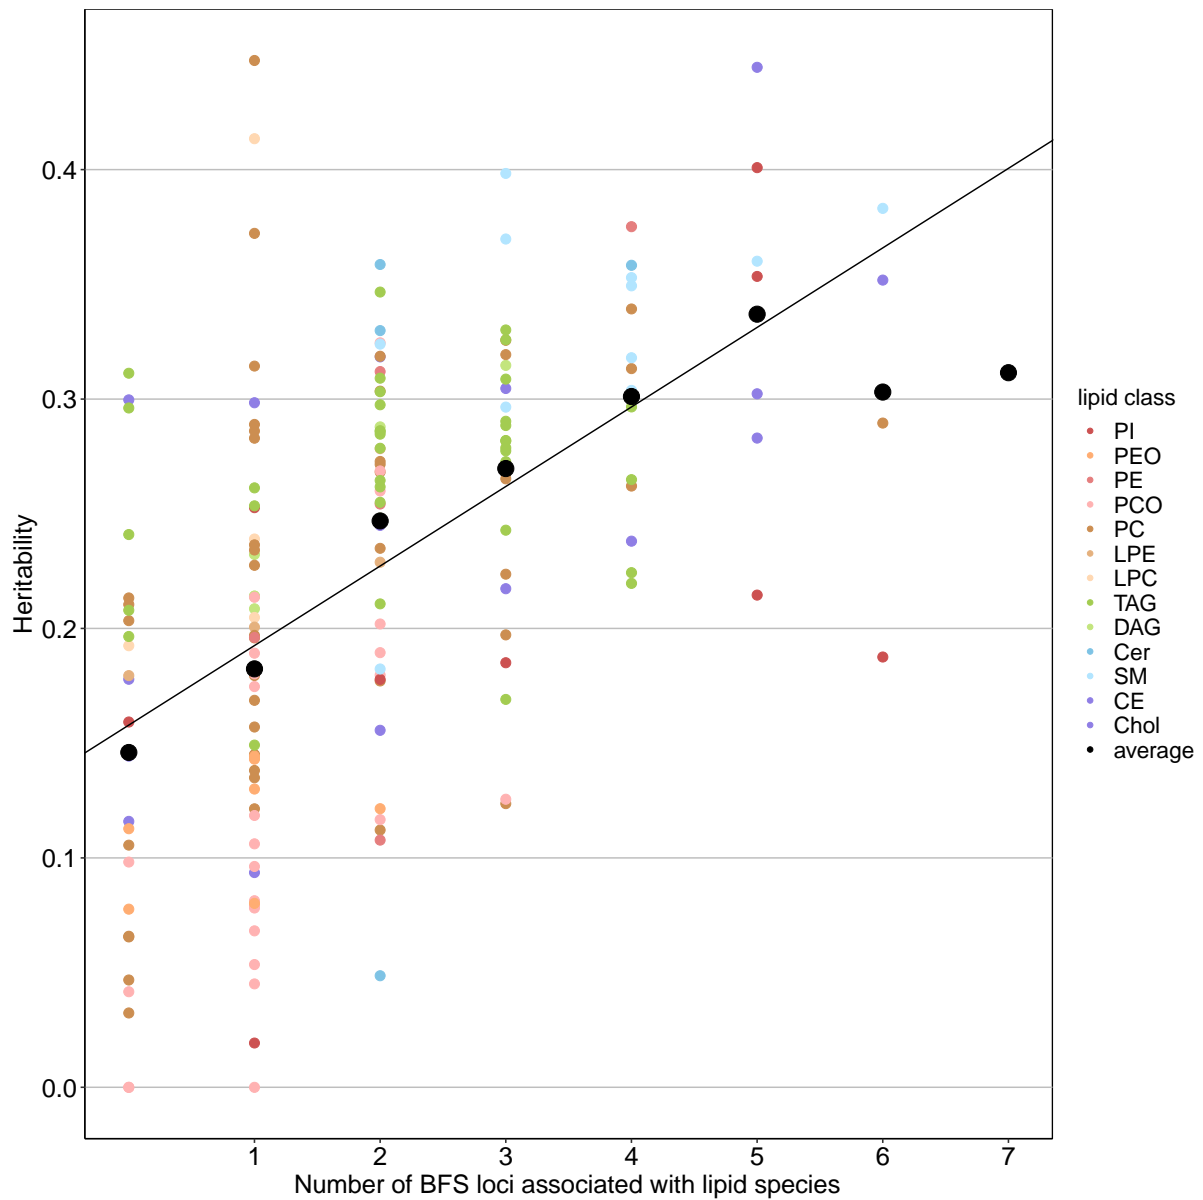

**Supplementary Figure 10. Relationship between heritability estimates and the number of loci reaching the Bonferroni-corrected significance threshold of  $7.352941 \times 10^{-10}$  per lipid species.** The black line shows the linear regression fit (intercept=0.157927;  $se=0.009911$ , slope=0.034667;  $se=0.003888$ ) with weights of the linear regression set to  $1/se^2$ . Larger black dots depict the average estimated heritability and smaller dots depict the individual heritability estimates colored by lipid class.

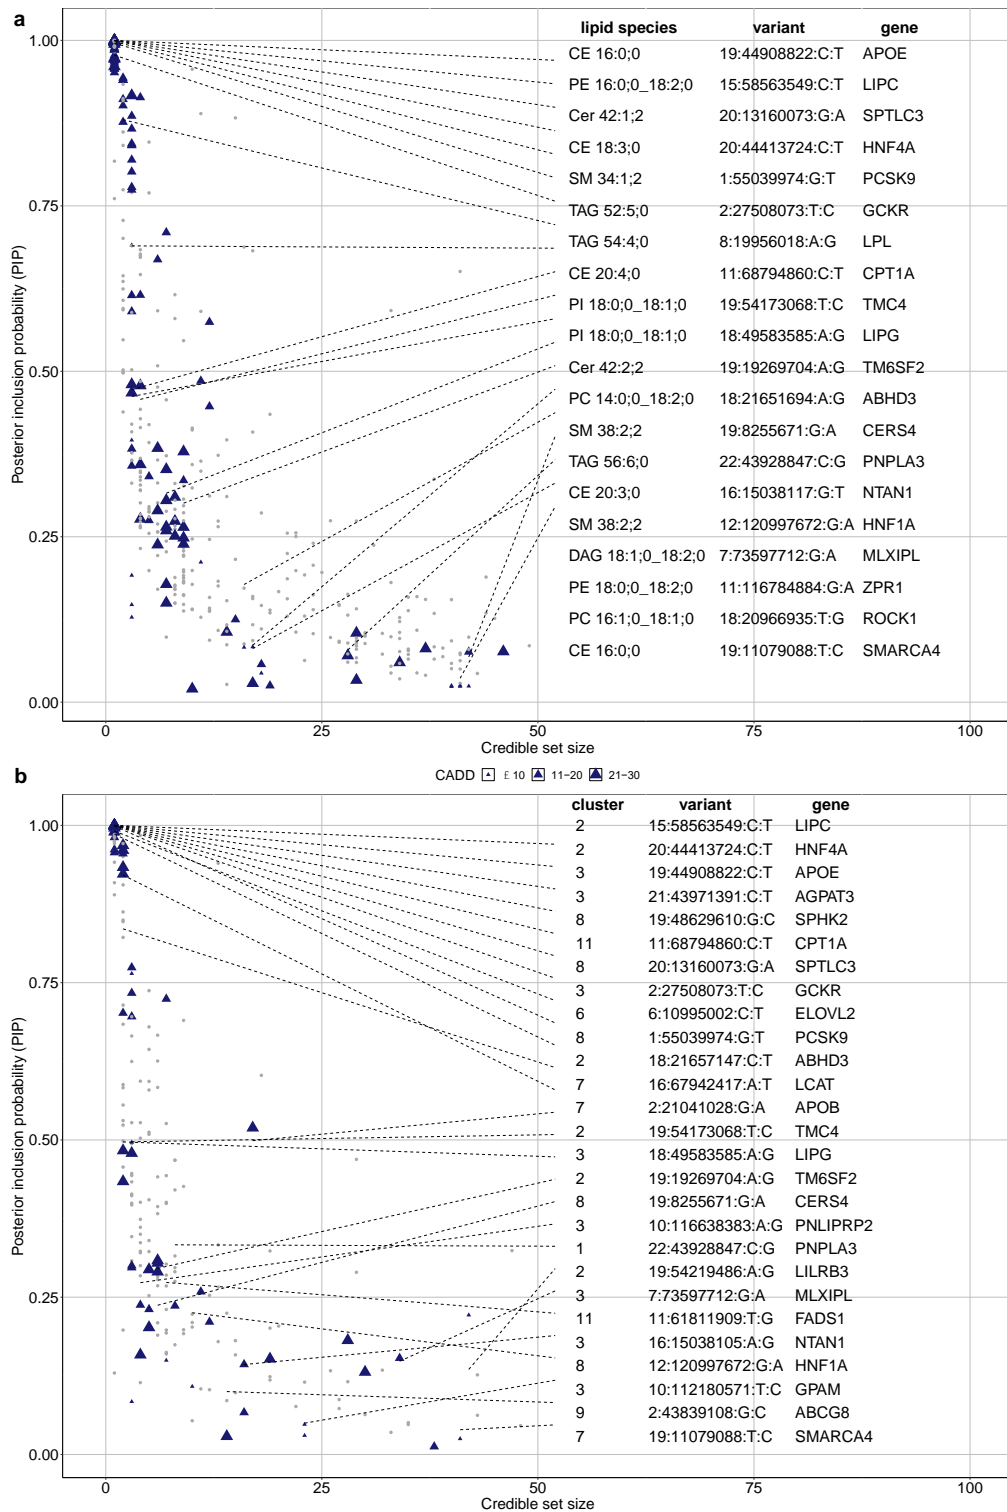

**Supplementary Figure 11. Representative variants of informative 95% credible sets with credible set size < 50 and top PIP > 1% of BFS loci in (a) univariate GWAS (b) multivariate GWAS plotted by credible set size against PIP. Blue triangles are functional variants, other SNPs are shown as gray dots. The size of the triangles is proportional to the variants' CADD score. For loci for which functional variants were among the representative variants, the functional representative variant with the lowest GWAS *P*-value is annotated with the top associated trait, variant id, and gene from VEP.**

**a**

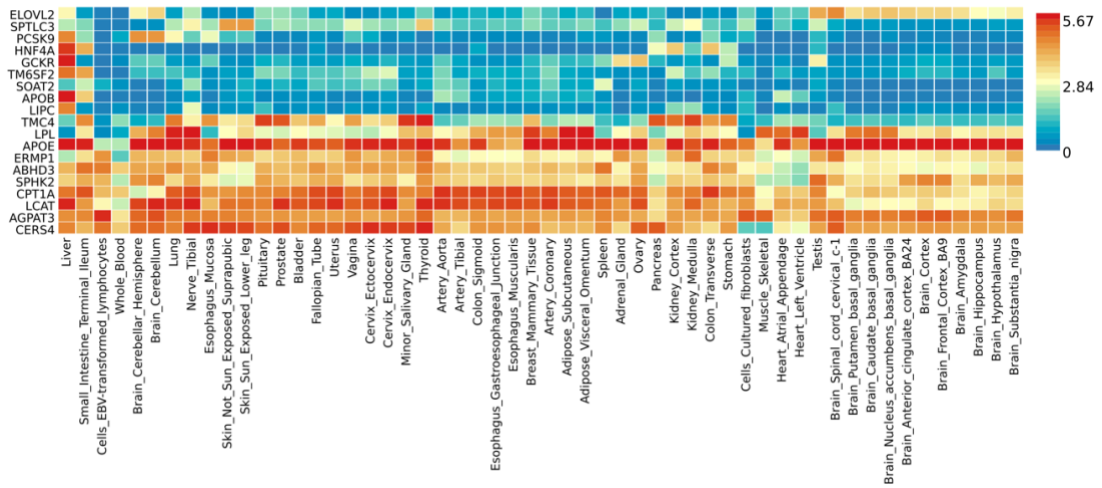

**b**

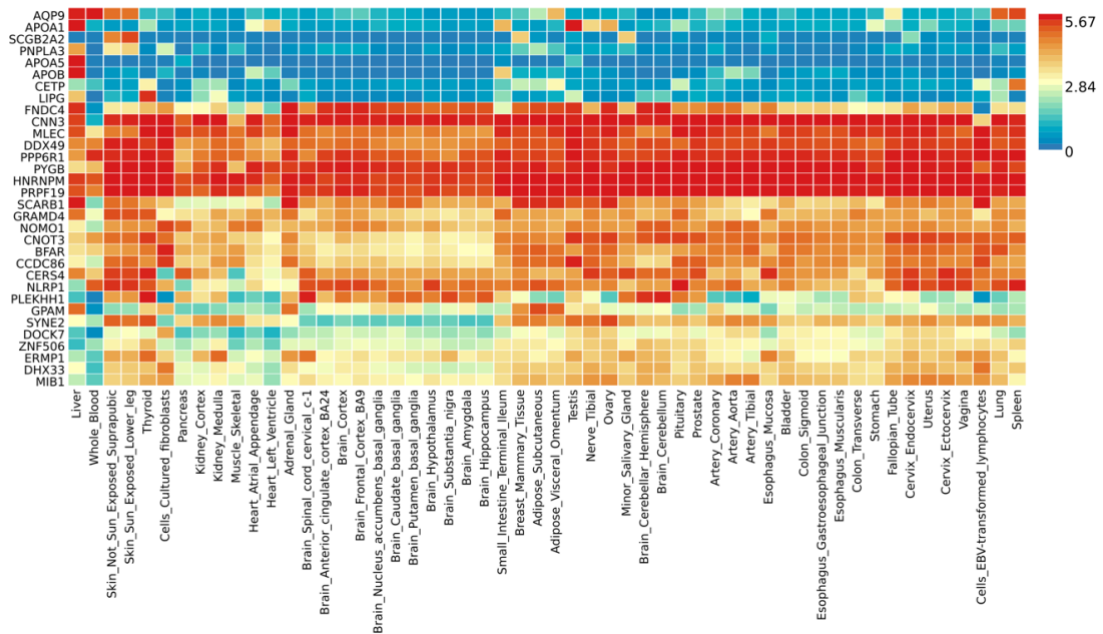

**Supplementary Figure 12. Heatmap of expression level in GTEx tissues of genes prioritized by (a) functional variant approach and (b) FOCUS. The average log<sub>2</sub> transformed expression value is shown.**

**a**

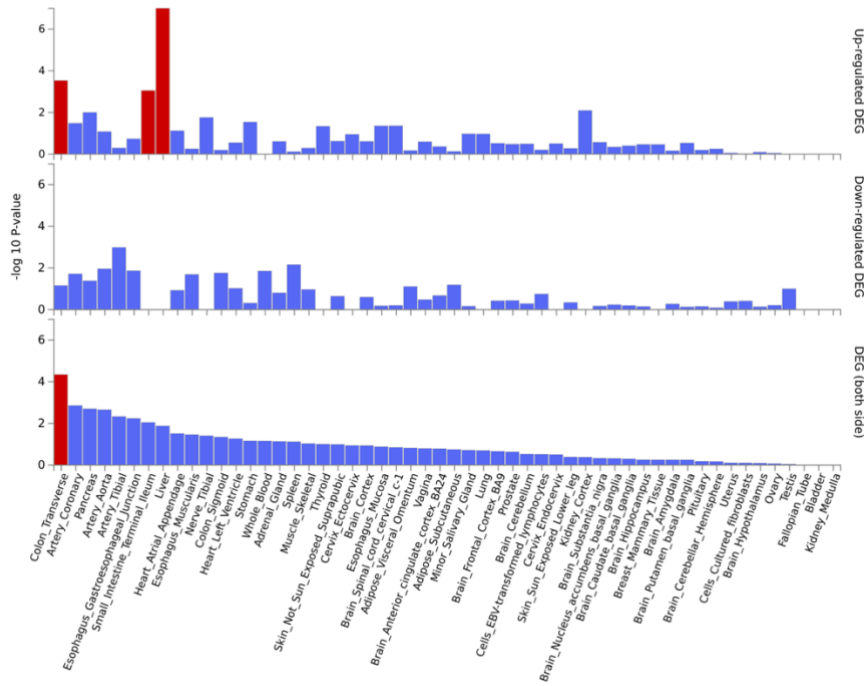

**b**

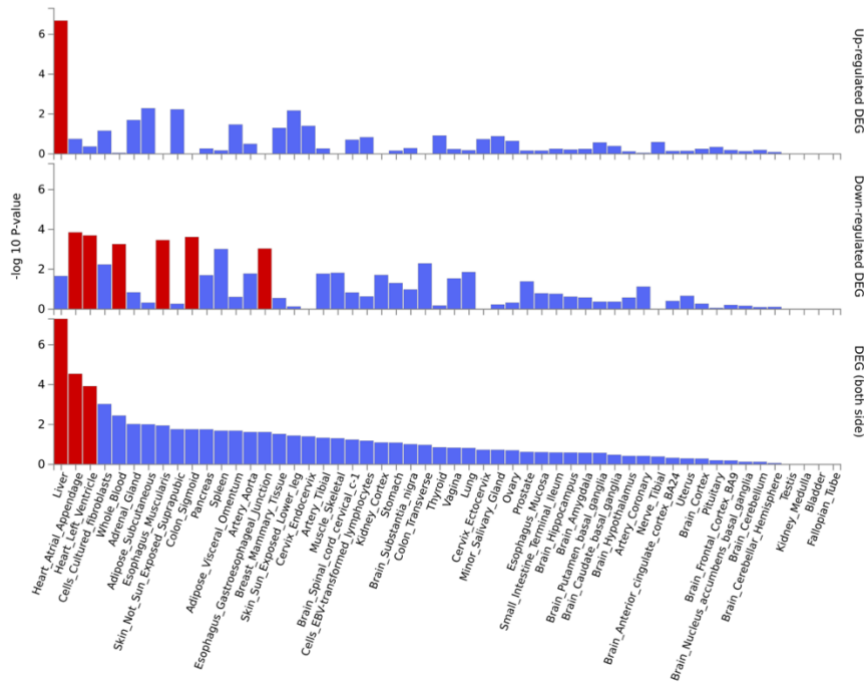

**Supplementary Figure 13. Enrichment of differentially expressed genes (DEG) sets for genes prioritized by (a) functional variant approach and (b) FOCUS in 53 GTEx tissues.** Significantly enriched DEG sets ( $P \leq 0.05$  corrected for multiple testing) are highlighted in red. DEG sets were calculated by FUMA using two-sided  $t$ -tests for each gene per tissue against all other tissues. The DEG set in a given tissue is defined as genes with multiple testing-corrected  $P$ -value  $< 0.05$  and absolute log fold change  $\geq 0.58$ . The sign of the  $t$ -score is used to distinguish between upregulated and downregulated genes in a given tissue compared to other tissues. To test for enrichment of genes in DEG sets, genes are tested against each of the DEG sets using the hypergeometric test. Genes with average expression value  $> 1$  in at least one of the tissues are utilized as background genes.



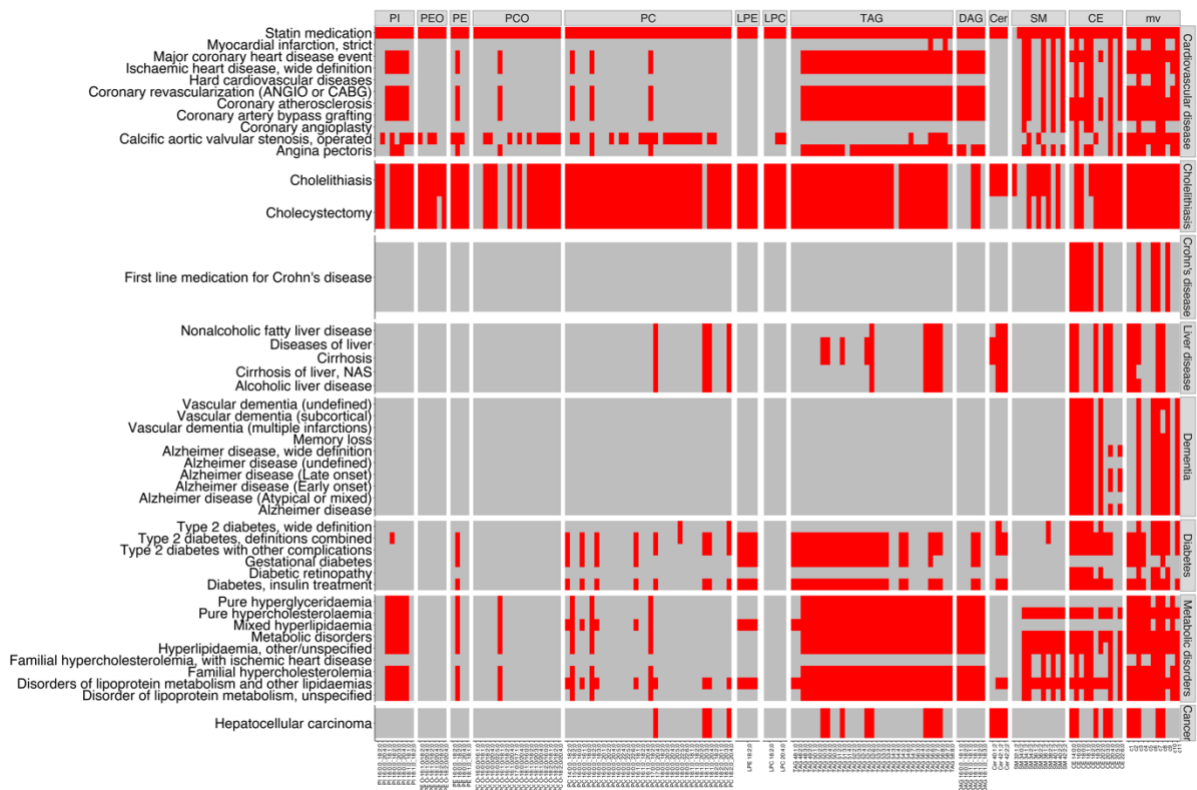

**Supplementary Figure 14. Heatmap of PheWAS associations.** Each entry in the heatmap represents a PheWAS endpoint of a disease endpoint (row), which is associated with variants among the lead variants or representative variants of a lipidome trait (column). Columns are split by lipid classes and rows are split by disease groups. Lead variants reaching the Bonferroni-corrected significance (BFS, uv:  $P < 7.352941e-10$ , mv:  $P < 4.545455e-9$ ) and representative variants of BFS associations are considered. PheWAS associations reaching BFS ( $P < 5.24659e-11$ ) are included. BFS associations are colored red. Two-sided  $P$ -values for lipidome traits were calculated using a linear-mixed-model (uv) and canonical correlation analysis (mv). Two-sided  $P$ -values for disease endpoints were calculated using mixed-model logistic regression.

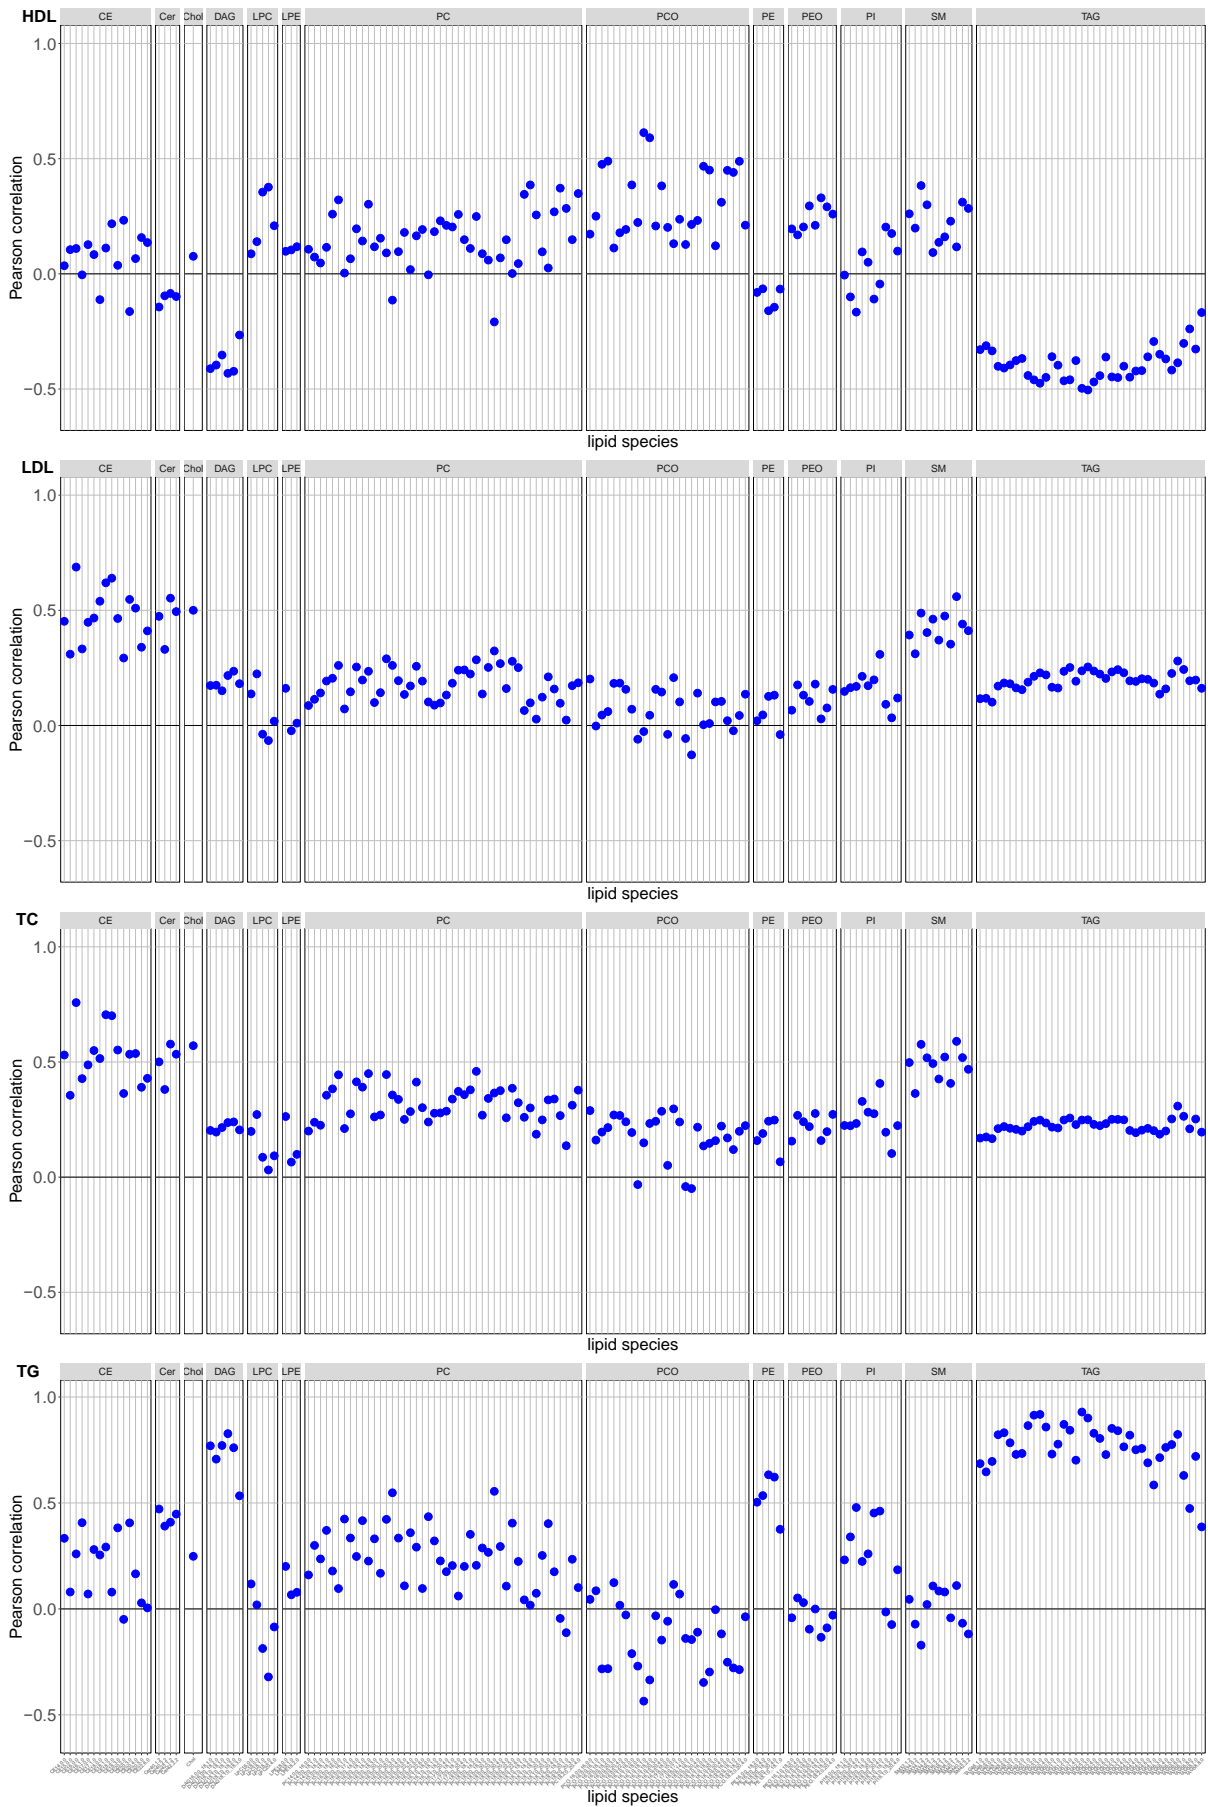

**Supplementary Figure 15. Pairwise Pearson correlations of lipid species and standard lipids.**

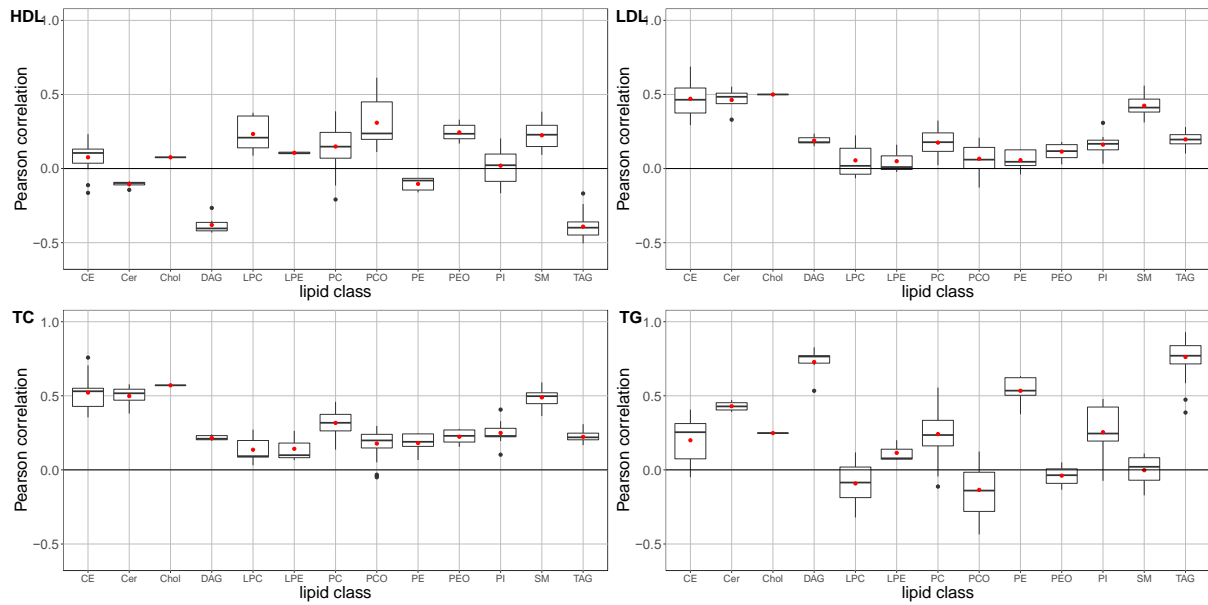

**Supplementary Figure 16. Boxplots of pairwise Pearson correlations of lipid species of different lipid classes and standard lipids.** The boxplots depict the mean Pearson correlation (middle line), interquartile range (IQR) defining the bounds of the box, and whiskers extending to the largest/smallest values no further than 1.5 times the IQR. Data beyond the end of whiskers are plotted individually. The number of lipid species per lipid class is: 15 (CE), 4 (Cer), 1 (Chol), 6 (DAG), 5 (LPC), 3 (LPE), 46 (PC), 27 (PCO), 5 (PE), 8 (PEO), 10 (PI), 11 (SM), 38 (TAG).

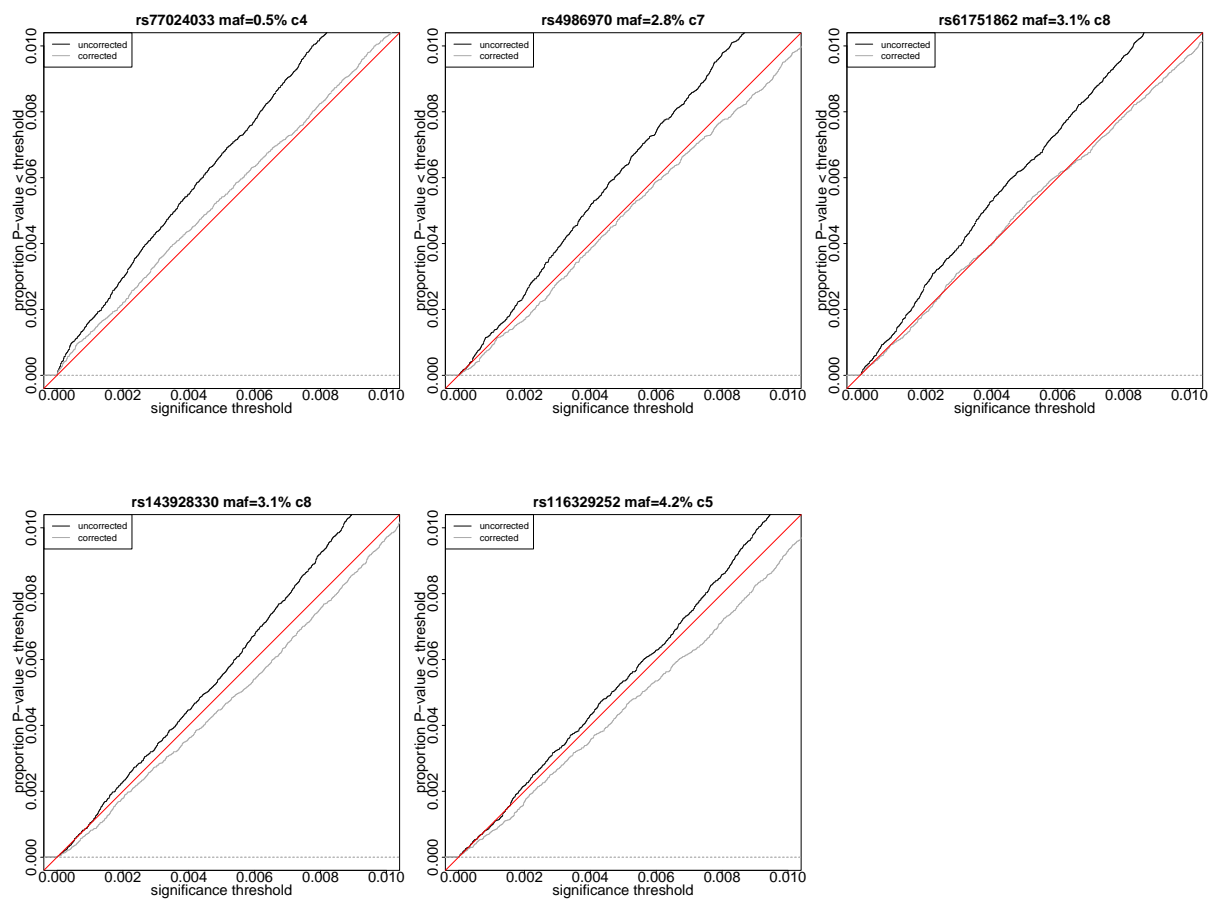

**Supplementary Figure 17. Empirical cumulative distribution function (ECDF) plots of simulated  $P$ -values for rare or low-frequency variants reaching GWS in a multivariate analysis, which did not reach GWS in a univariate GWAS. The ECDF for uncorrected  $P$ -values is depicted by a black line and corrected  $P$ -values by a grey line. Red line shows the diagonal.**
