# Supplementary material for: Genome-wide association analysis of plasma lipidome identifies 495 genetic associations
Source: PubMed Central journal article supplement (PMC10618167; doi:10.1038/s41467-023-42532-8), 2023-10-31
Supplement: 41467_2023_42532_MOESM3_ESM.pdf [file 41467_2023_42532_MOESM3_ESM.pdf]

## **Description of Additional Supplementary Files**

File Name: Supplementary Data 1

Description: Lipid species information and FinnGen consortium members.

File Name: Supplementary Data 2

Description: Loci reaching genome-wide significance (GWS) in univariate or multivariate GWAS.

File Name: Supplementary Data 3

Description: Results of fine-mapping analysis by FINEMAP.

File Name: Supplementary Data 4

Description: Results of gene prioritization and gene set enrichment analysis.

File Name: Supplementary Data 5

Description: Results of PheWAS.

File Name: Supplementary Data 6

Description: Results of colocalization analysis and lipid species associations with CAD loci.

File Name: Supplementary Data 7

Description: Associated variants from previous standard lipids and lipidome studies.
